# Supplementary material for: Associations of physical frailty with health outcomes and brain structure in 483 033 middle-aged and older adults: a population-based study from the UK Biobank
Source: PubMed Central journal article supplement (PMC10257912; doi:10.1016/s2589-7500(23)00043-2), 2023-04-14
Supplement: NIHMS1904457-supplement-1.pdf [file NIHMS1904457-supplement-1.pdf]

# THE LANCET

## Digital Health

### Supplementary appendix 1

This appendix formed part of the original submission and has been peer reviewed. We post it as supplied by the authors.

Supplement to: Jiang R, Noble S, Sui J, et al. Associations of physical frailty with health outcomes and brain structure in 483 033 middle-aged and older adults: a population-based study from the UK Biobank. *Lancet Digit Health* 2023; published online April 13. [https://doi.org/10.1016/S2589-7500\(23\)00043-2](https://doi.org/10.1016/S2589-7500(23)00043-2).

# Associations of physical frailty with health outcomes and brain structure in 483,033 middle-aged and older adults: a population-based study from the UK Biobank

## Appendix

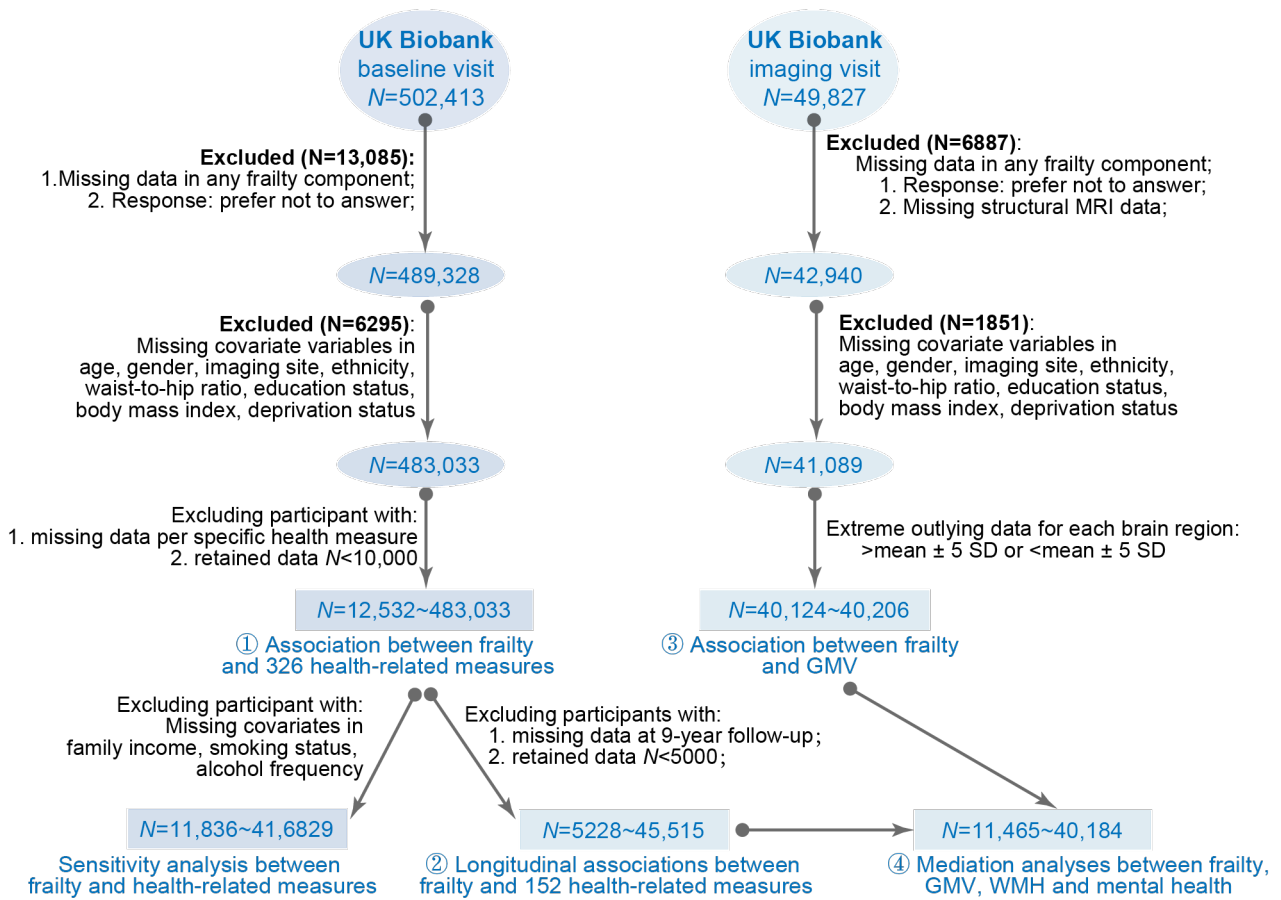

**Figure S1.** Flowchart illustrating criteria for selection of samples for each of the four primary analyses performed in the present study. Overall, we included up to 483,033 participants for the cross-sectional association analysis (N ranged from 12,532 to 483,033 per specific health-related measure), 46,501 participants for longitudinal association analyses (N ranged from 5,228 to 45,515 per specific health-related measure), and 40,210 participants for the imaging association analyses (N ranged from 40,124 to 40,206 per specific regional GMV).

**Table S1. Definition of frailty**

| Frailty indicators | UK Biobank question                                                                                                                                                                                                                                                                                                                                                                                                                                                                                                                                                                                                                                                                                                                                                                                                               | Field ID      |
|--------------------|-----------------------------------------------------------------------------------------------------------------------------------------------------------------------------------------------------------------------------------------------------------------------------------------------------------------------------------------------------------------------------------------------------------------------------------------------------------------------------------------------------------------------------------------------------------------------------------------------------------------------------------------------------------------------------------------------------------------------------------------------------------------------------------------------------------------------------------|---------------|
| Weight loss        | Question: Compared with one year ago, has your weight changed? <ul style="list-style-type: none"> <li>• Yes - lost weight=1;</li> <li>• No - weigh about the same=0;</li> <li>• Yes - gained weight=0;</li> <li>• Do not know=0;</li> <li>• Prefer not to answer=excluded</li> </ul>                                                                                                                                                                                                                                                                                                                                                                                                                                                                                                                                              | 2306          |
| Exhaustion         | Question: Over the past two weeks, how often have you felt tired or had little energy? <ul style="list-style-type: none"> <li>• Not at all=0;</li> <li>• Several days=0;</li> <li>• More than half the days=1;</li> <li>• Nearly every day=1;</li> <li>• Do not know=0</li> <li>• Prefer not to answer=excluded</li> </ul>                                                                                                                                                                                                                                                                                                                                                                                                                                                                                                        | 2080          |
| Walking speed      | Question: How would you describe your usual walking pace? <ul style="list-style-type: none"> <li>• Slow pace=1;</li> <li>• Steady average pace=0;</li> <li>• Brisk pace=0;</li> <li>• None of the above/Prefer not to answer=excluded</li> </ul>                                                                                                                                                                                                                                                                                                                                                                                                                                                                                                                                                                                  | 924           |
| Weakness           | Grip strength was assessed isometrically using a calibrated J00105 hydraulic hand dynamometer (Lafayette Instrument Company, IN, USA), separately in the left and right arms. The average of the right and left measurement was used here, or the available one when either measurement is missing <sup>1</sup> .<br>Cut-offs used to define low grip strength: <ul style="list-style-type: none"> <li>• Males:<br/>               BMI≤24 &amp; grip strength≤29;<br/>               24.1≤BMI≤28 &amp; grip strength≤30;<br/>               BMI&gt;28 &amp; grip strength≤32</li> <li>• Females:<br/>               BMI≤23 &amp; grip strength≤17;<br/>               23.1≤BMI≤26 &amp; grip strength≤17.3;<br/>               26.1≤BMI≤29 &amp; grip strength≤18;<br/>               BMI&gt;29 &amp; grip strength≤21</li> </ul> | 46; 47        |
| Physical activity  | Question: In the last 4 weeks did you spend any time doing the following? <ul style="list-style-type: none"> <li>• Walking for pleasure =0;</li> <li>• Strenuous sports=0;</li> <li>• Light DIY (eg: pruning, watering the lawn):<br/>               Frequency of once per week or less=1;<br/>               Frequency of more than once per week=0;</li> <li>• Heavy DIY (eg: weeding, lawn mowing, carpentry, digging) =0;</li> <li>• Other exercises (eg: swimming, cycling, keep fit, bowling) =0;</li> <li>• None of the above=1;</li> <li>• Prefer not to answer=excluded</li> </ul>                                                                                                                                                                                                                                       | 6164;<br>1011 |

Indicators of physical frailty were measured at both baseline and follow-up visits. In UK Biobank, each field had a unique Field ID, and the instance index was used to distinguish the data field which was gathered at a different time (0 for the baseline visit, and 2 for the imaging visit). Therefore, the UK Biobank Field IDs for calculating physical frailty at baseline were 2306-0.0, 2080-0.0, 924-0.0, 46-0.0, 47-0.0, 6164-0.0, and 1011-0.0; Field IDs for calculating physical frailty at follow-up visit were 2306-2.0, 2080-2.0, 924-2.0, 46-2.0, 47-2.0, 6164-2.0, and 1011-2.0.

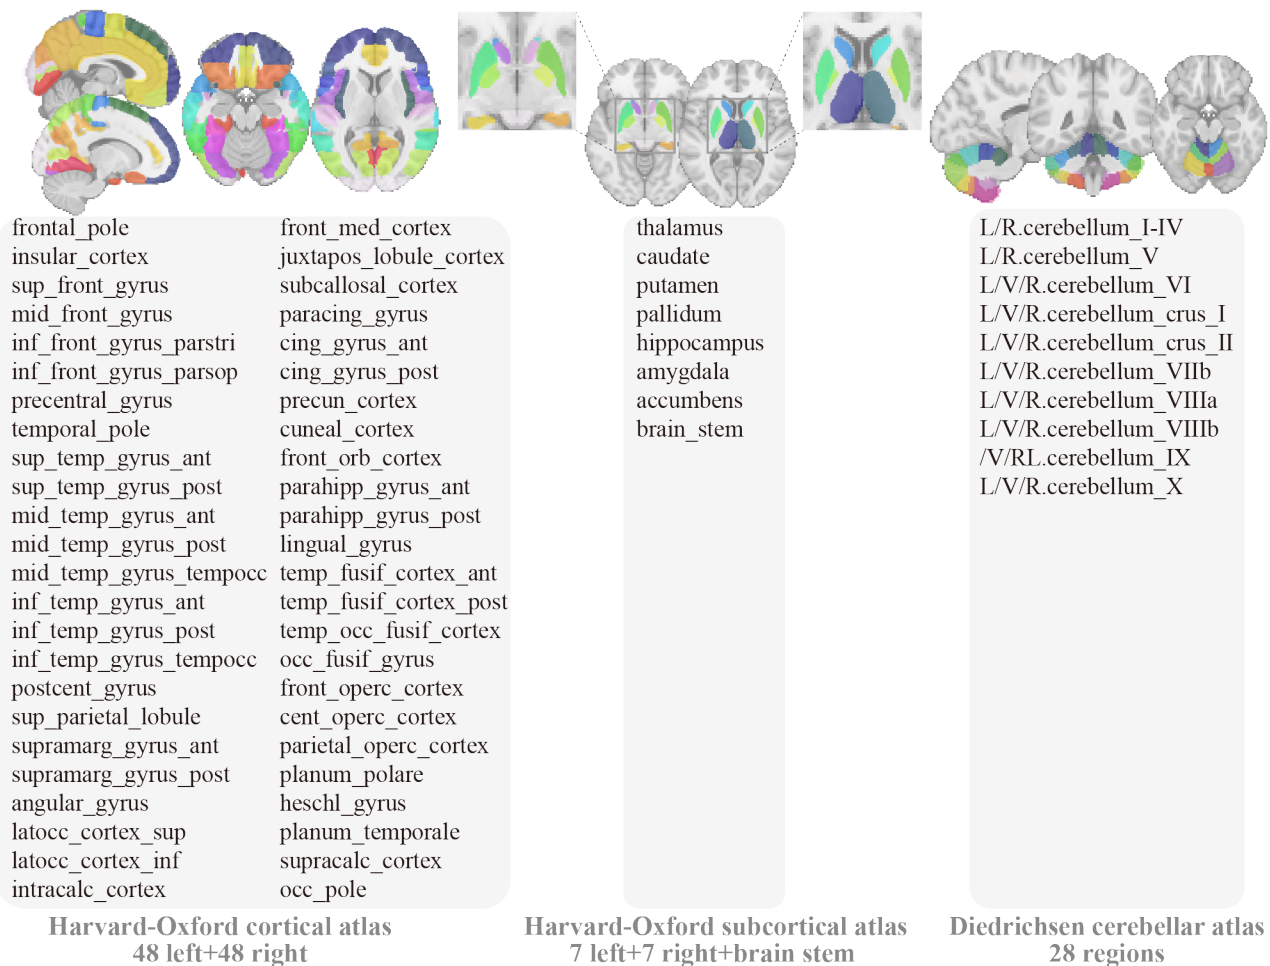

**Figure S2.** List of names for 139 brain regions. All brain MRI data were acquired on a 3T Siemens Skyra scanner using a standard 32-channel head coil. Of relevance to this study, T1-weighted MPRAGE were obtained in sagittal orientation using the following parameters: resolution: 1×1×1 mm, field-of-view (FOV): 208×256×256 matrix, duration: 5 minutes; T2-weighted FLAIR volumes were acquired in sagittal orientation using the following parameters: resolution: 1.05×1×1 mm, FOV: 192×256×256 matrix, duration: 6 minutes. The tissue-type segmentation was applied using FAST (FMRIB’s Automated Segmentation Tool), and subcortical structures were modeled using FIRST (FMRIB’s Integrated Registration and Segmentation Tool)<sup>2</sup>. The 139 brain regions include 96 cortical and 15 subcortical regions based on Harvard-Oxford atlas (<https://fsl.fmrib.ox.ac.uk/fsl/fslwiki/Atlases>), and 28 cerebellar regions based on Diedrichsen cerebellar atlas (<http://www.diedrichsenlab.org/imaging/propatlas.htm>). GMV segmentation based on FAST and FIRST is one of the most widely used methods to delineate gray matter structures from MR images. Among the multiple tools to segment brain structure in UK Biobank, we chose the current one because it has been widely used in other studies investigating the association between GMV and multiple behaviors (e.g., smoking<sup>3</sup>, alcohol<sup>4</sup>, obesity<sup>5</sup>, diabetes<sup>6</sup>, grip strength<sup>7</sup>, and etc.), making our results amenable to replication. Additionally, segmentation based on FAST and FIRST generated 139 brain regions including cortical, subcortical, and cerebellar areas. In contrast, segmentation based on Freesurfer only includes cortical and subcortical regions but not cerebellar areas.

**Table S2. Characteristic of participants used in the current study**

|                                                     | Cross-sectional analyses  | Longitudinal analyses     | Imaging analyses          | Field ID |
|-----------------------------------------------------|---------------------------|---------------------------|---------------------------|----------|
| Total N                                             | 483,033                   | 46,501                    | 40,210                    |          |
| Age (mean $\pm$ sd)<br>range                        | 56.51 $\pm$ 8.08<br>38~73 | 64.12 $\pm$ 7.73<br>44~82 | 63.87 $\pm$ 7.67<br>44~82 | 21003    |
| Sex, N/%                                            |                           |                           |                           | 31       |
| Female                                              | 262,784/54.40             | 23,907/51.41              | 21,220/52.77              |          |
| Male                                                | 220,249/45.60             | 22,594/48.59              | 18,990/47.23              |          |
| Ethnicity, N/%                                      |                           |                           |                           | 21000    |
| White                                               | 457,357/94.68             | 45,030/96.84              | 38,935/96.83              |          |
| Non-White                                           | 25,676/5.32               | 1,471/3.16                | 1,275/3.17                |          |
| Body mass index (kg/m <sup>2</sup> , mean $\pm$ sd) | 27.40 $\pm$ 4.77          | 26.58 $\pm$ 4.45          | 26.48 $\pm$ 4.37          | 21001    |
| Waist-to-hip ratio (mean $\pm$ sd)                  | 0.87 $\pm$ 0.090          | 0.88 $\pm$ 0.089          | 0.87 $\pm$ 0.088          | 48; 49   |
| Data acquisition date (range)                       | 12/19/2006<br>10/01/2010  | 04/30/2014<br>03/13/2020  | 05/02/2014<br>03/13/2020  | 53       |
| Townsend deprivation index<br>(mean $\pm$ sd)       | -1.34 $\pm$ 3.07          | -1.89 $\pm$ 2.72          | -1.90 $\pm$ 2.72          | 189      |
| Average total household income, N/%                 |                           |                           |                           | 738      |
| Low (<£51,999)                                      | 308,637/63.90             | 29,551/63.55              | 25,394/63.15              |          |
| Middle (£52,000–£100,000)                           | 85,435/17.69              | 9,658/20.77               | 8,454/21.02               |          |
| High (>£100,000)                                    | 22,757/4.71               | 3,020/6.49                | 2,694/6.70                |          |
| Unknown                                             | 66,204/13.71              | 4,272/9.19                | 3,668/9.12                |          |
| Education levels, N/%                               |                           |                           |                           | 6138     |
| College/University                                  | 158,986/32.91             | 22,579/48.56              | 19,769/49.16              |          |
| Less than College                                   | 324,047/67.09             | 23,922/51.44              | 20,441/50.84              |          |
| Smoking status, N/%                                 |                           |                           |                           | 20116    |
| Never                                               | 263,871/54.63             | 28,838/62.02              | 25,177/62.61              |          |
| Ever                                                | 16,733/134.64             | 15,897/34.19              | 13,550/33.70              |          |
| Current                                             | 50,259/10.40              | 1,627/3.50                | 1,366/3.40                |          |
| Unknown                                             | 1,572/0.33                | 139/0.30                  | 117/0.29                  |          |
| Alcohol intake frequency, N/%                       |                           |                           |                           | 1558     |
| Daily or almost daily                               | 99,181/20.53              | 8,009/17.22               | 6,833/16.99               |          |
| Three or four times a week                          | 112,478/23.29             | 13,046/28.06              | 11,327/28.17              |          |
| Once or twice a week                                | 124,983/25.87             | 12,207/26.25              | 10,633/26.44              |          |
| One to three times a month                          | 53,918/11.16              | 5,359/11.52               | 4,646/11.55               |          |
| Special occasions only                              | 54,773/11.34              | 4,767/10.25               | 4,137/10.29               |          |
| Never                                               | 37,379/7.74               | 3,103/6.67                | 2,626/6.53                |          |
| Unknown                                             | 321/0.07                  | 10/0.02                   | 8/0.02                    |          |
| Frailty severity, N/%                               |                           |                           |                           |          |
| 0                                                   | 267091/55.29              | 26,328/56.62              | 22,991/57.18              |          |
| 1                                                   | 148536/30.75              | 15,193/32.67              | 13,059/32.48              |          |
| 2                                                   | 47370/9.81                | 3,921/8.43                | 3,285/8.17                |          |
| 3                                                   | 14918/3.09                | 849/1.83                  | 700/1.74                  |          |
| 4                                                   | 4513/0.93                 | 197/0.42                  | 156/0.39                  |          |
| 5                                                   | 605/0.13                  | 22/0.05                   | 19/0.05                   |          |

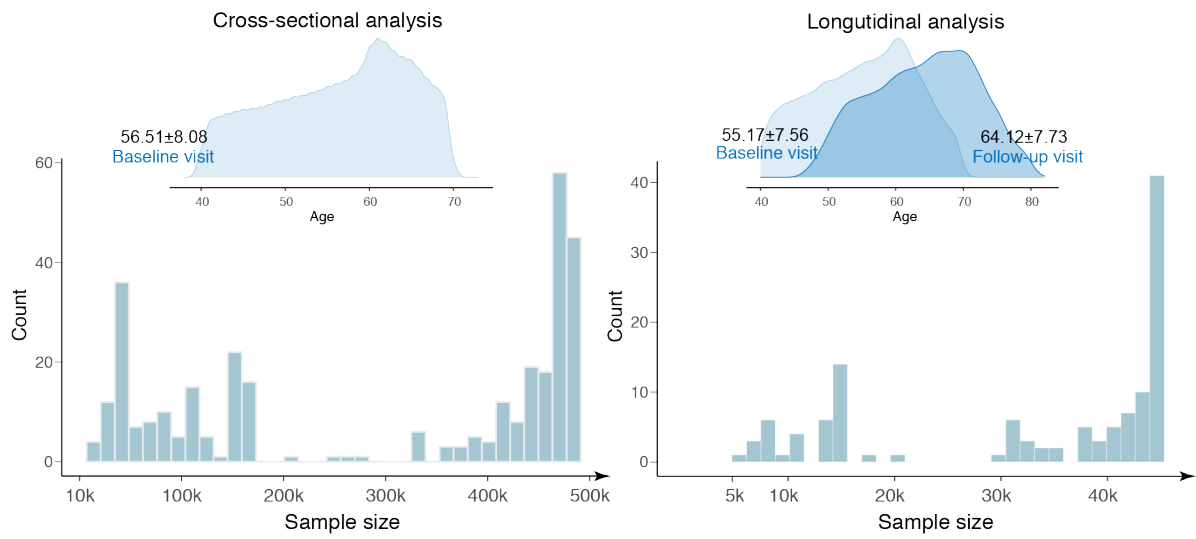

**Figure S3.** Distribution of age and sample sizes of participants used in cross-sectional and longitudinal analyses.

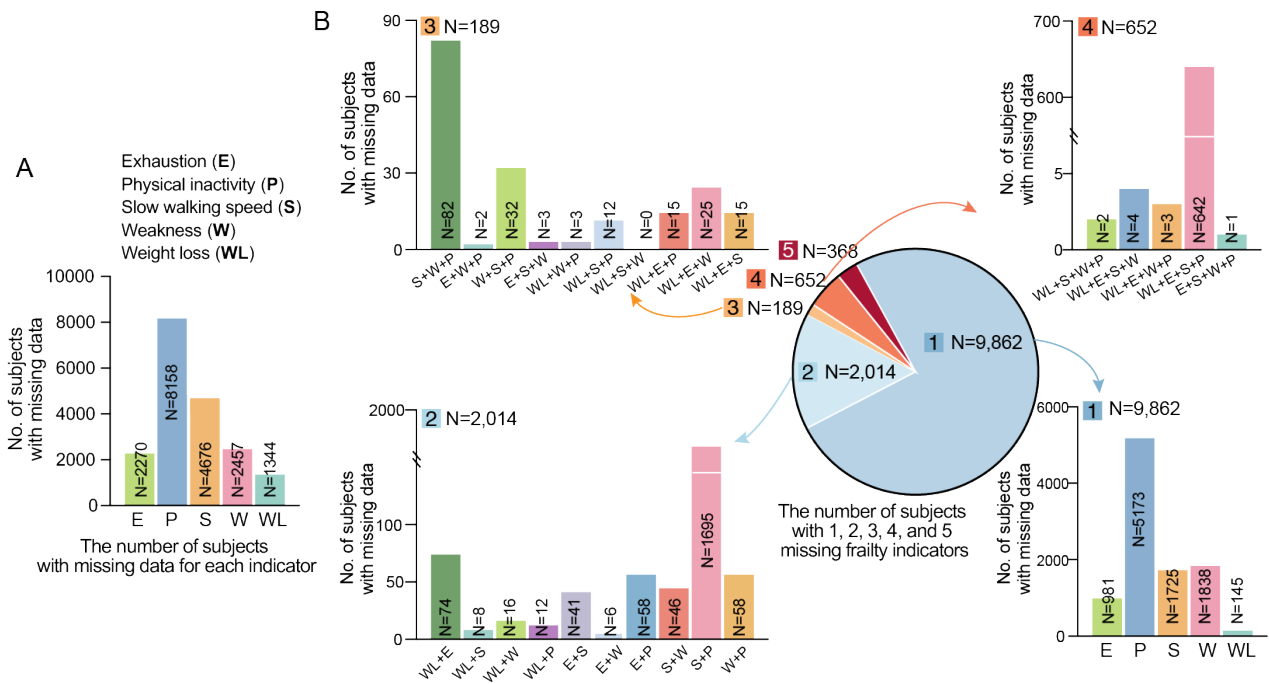

**Figure S4.** Missingness of frailty indicators in UK Biobank. A total of 13,085 participants were excluded from our analysis due to missing data on at least one of the five frailty indicators (as shown in Figure S1). **(A)** The number of participants with missing data for each indicator was: N=2270 (exhaustion), N=8158 (physical inactivity), N=4676 (slow walking speed), N=2457 (weakness), and N=1344 (weight loss). Among the five frailty indicators, ‘Physical inactivity’ had the highest number of missing participants. This can be partially attributed to the fact that the derivation of ‘physical inactivity’ was based on two fields (physical type and physical frequency), while the other indicators were derived based on only one field. ‘Weight loss’ had the least number of missing participants. **(B)** The number of participants with one (N=9862), two (N=2014), three (N=189), four (N=652), and five (N=368) missing frailty indicators, and the detailed missingness for each condition. 75.37% (9862/13,085) of all missing participants had only one missing indicator of frailty. For participants with only one missing indicator, ‘Physical inactivity’ was the most common reason of missingness, and the number of missing participants in each of the other four indicators was small. For participants with only two missing indicators, ‘Slow walking speed’ + ‘Physical inactivity’ was the most common combination.

**Table S3. Characteristic of participants with all frailty indicators (the complete-case sample) and those missing at least one frailty indicator**

|                                                     | Complete-case sample      | Missing data on frailty   | P for difference |
|-----------------------------------------------------|---------------------------|---------------------------|------------------|
| Total N                                             | 483,033                   | 13,085                    |                  |
| Age (mean $\pm$ sd)<br>range                        | 56.51 $\pm$ 8.08<br>38~73 | 56.55 $\pm$ 8.31<br>37~70 | 0.54             |
| Sex, N/%                                            |                           |                           | 0.0004           |
| Female                                              | 262,784/54.40             | 7,324/55.97               |                  |
| Male                                                | 220,249/45.60             | 5,761/44.03               |                  |
| Ethnicity, N/%                                      |                           |                           | P<0.001          |
| White                                               | 457,357/94.68             | 10,098/77.17              |                  |
| Non-White                                           | 25,676/5.32               | 2,987/22.83               |                  |
| Body mass index (kg/m <sup>2</sup> , mean $\pm$ sd) | 27.40 $\pm$ 4.77          | 28.52 $\pm$ 5.88          | P<0.001          |
| Waist-to-hip ratio (mean $\pm$ sd)                  | 0.87 $\pm$ 0.090          | 0.88 $\pm$ 0.094          | P<0.001          |
| Data acquisition date (range)                       | 12/19/2006<br>10/01/2010  | 03/13/2006<br>09/22/2010  | NA               |
| Townsend deprivation index (mean $\pm$ sd)          | -1.34 $\pm$ 3.07          | -0.002 $\pm$ 3.55         | P<0.001          |
| Average total household income, N/%                 |                           |                           | P<0.001          |
| Low (<£51,999)                                      | 308,637/63.90             | 4,855/37.10               |                  |
| Middle (£52,000–£100,000)                           | 85,435/17.69              | 513/3.92                  |                  |
| High (>£100,000)                                    | 22,757/4.71               | 107/0.82                  |                  |
| Unknown                                             | 66,204/13.71              | 7,610/58.16               |                  |
| Education levels, N/%                               |                           |                           | P<0.001          |
| College/University                                  | 158,986/32.91             | 1,684/12.87               |                  |
| Less than College                                   | 324,047/67.09             | 6,060/46.31               |                  |
| Unknown                                             | 0/0                       | 5,341/40.82               |                  |
| Smoking status, N/%                                 |                           |                           | P<0.001          |
| Never                                               | 263,871/54.63             | 6,241/47.70               |                  |
| Ever                                                | 16,733/34.64              | 3,714/28.38               |                  |
| Current                                             | 50,259/10.40              | 1,889/14.44               |                  |
| Unknown                                             | 1,572/0.33                | 1,241/9.48                |                  |
| Alcohol intake frequency, N/%                       |                           |                           | P<0.001          |
| Daily or almost daily                               | 99,181/20.53              | 1,777/13.58               |                  |
| Three or four times a week                          | 112,478/23.29             | 1,923/14.70               |                  |
| Once or twice a week                                | 124,983/25.87             | 2,683/20.50               |                  |
| One to three times a month                          | 53,918/11.16              | 1,226/9.37                |                  |
| Special occasions only                              | 54,773/11.34              | 2,135/16.32               |                  |
| Never                                               | 37,379/7.74               | 2,196/16.78               |                  |
| Unknown                                             | 321/0.07                  | 1,145/8.76                |                  |

A total of 13,085 participants were excluded from our analysis due to having missing data on at least one of the five frailty indicators. This table shows the characteristic of the complete-case sample (with complete data on frailty and basic covariates) and those missing at least one frailty indicator. Results indicated that the excluded participants were more likely to be females, non-White, and materially deprived, had lower education levels and family income, and higher body-mass index and waist-to-hip ratio. They were also more likely to smoke. Notably, participants having missing data on one or more indicators of frailty were also more likely to have missing data on covariates, compared with the complete-case sample. The mean values of body-mass index, waist-to-hip ratio, and Townsend deprivation index for the excluded participants were calculated based on complete data.



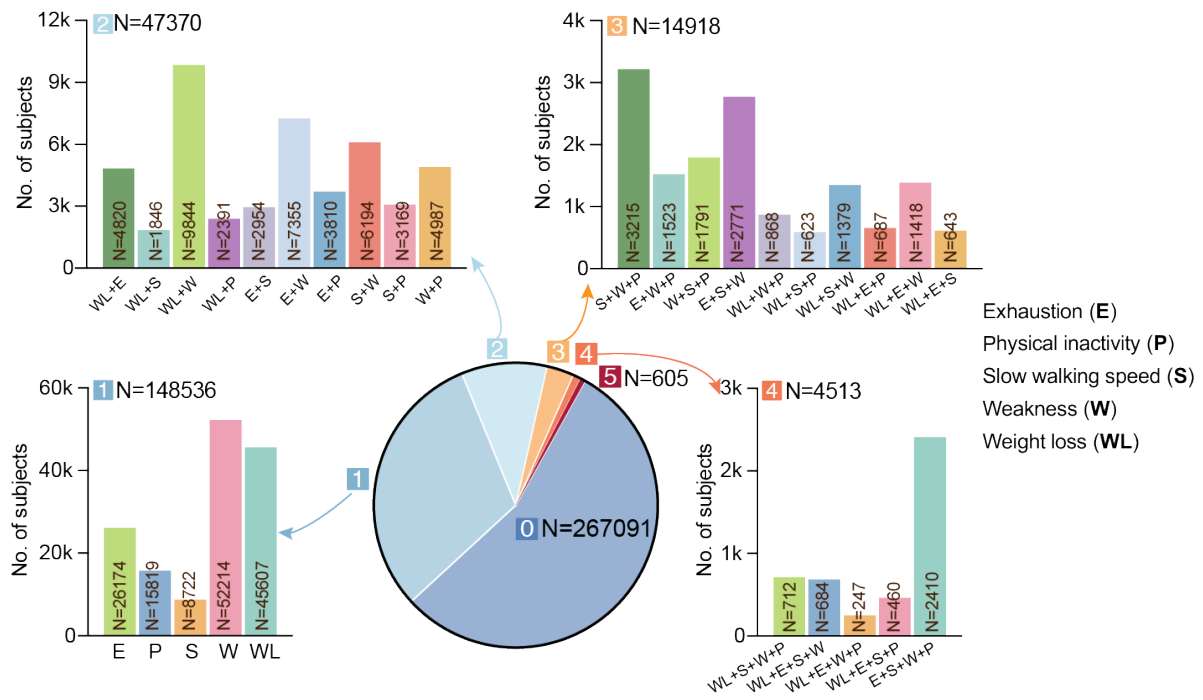

**Figure S5.** The number of participants with 0, 1, 2, 3, 4, and 5 frailty indicators was N=267,091, N=148,536, N=47,370, N=14,918, N=4,513, N=1344, and N=605, respectively. The barplot shows the number of subjects with different combinations of frailty indicators.

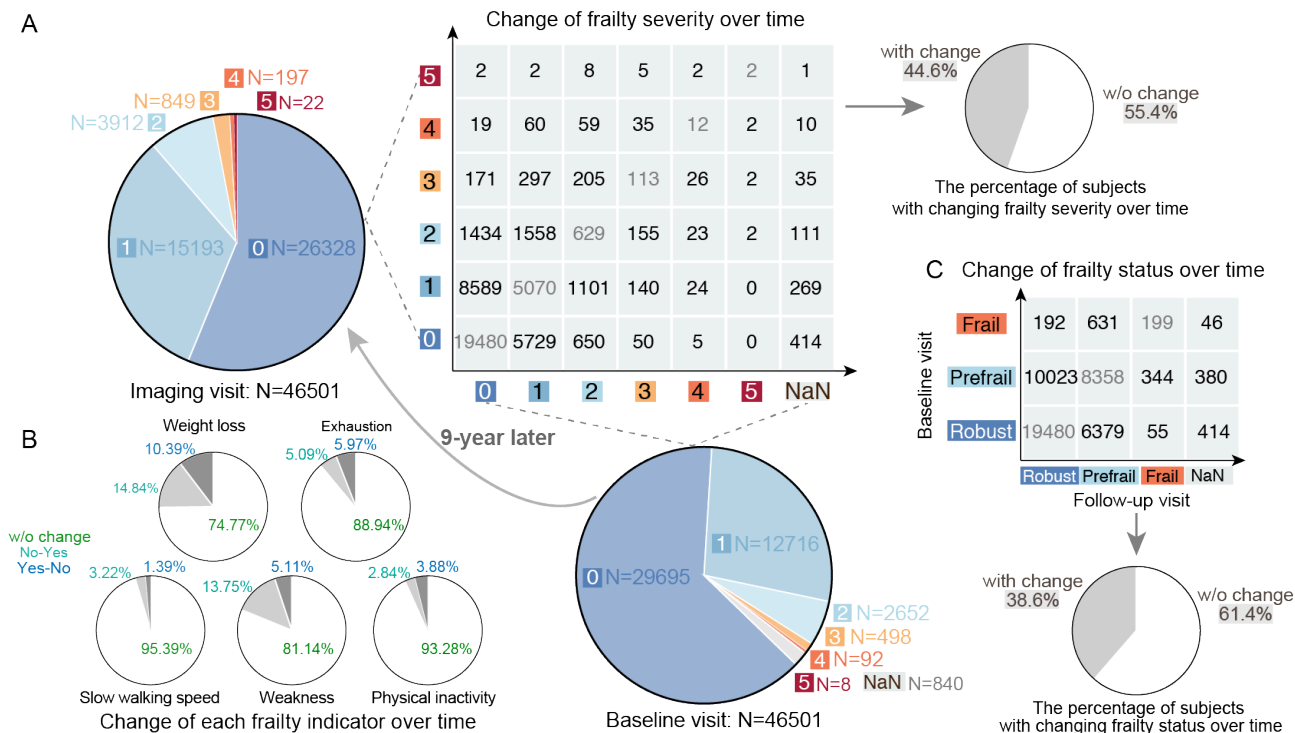

**Figure S6.** Fluctuation of severity of physical frailty over time (9-year). **(A)** We included up to 46,501 participants for longitudinal association analyses. The number of participants with 0, 1, 2, 3, 4, and 5 frailty indicators at baseline and 9-year follow-up is shown in the pie chart. The frailty severity at baseline was significantly correlated with that at follow-up ( $r=0.36$ ,  $P<10^{-10}$ ). The cell plot shows how the frailty severity fluctuates over time. Overall, a substantial proportion (44.6%, 20355/45661) of UK Biobank participants experienced at least one transition over time, which included both worsening and improvement in frailty severity. **(B)** Change of each frailty indicator over time. Response to each of the five frailty indicators was dichotomized into 'Yes' (which means the indicator presents) or 'No' (which means the indicator does not present). Among all five indicators, weight loss (25.23%) showed the highest rate of change over time, followed by weakness (18.86%), and exhaustion (11.06%). Physical inactivity (6.72%) and slow walking speed (4.61%) showed a low percentage of change. **(C)** Participants were classified as frail if they fulfilled three or more of the five criteria, prefrail if they fulfilled one or two criteria, and robust if they did not fulfill any criteria<sup>8-11</sup>. The percentage of participants showing changes in frailty status (robust, prefrail, and frail) was 38.6% (17624/45661).

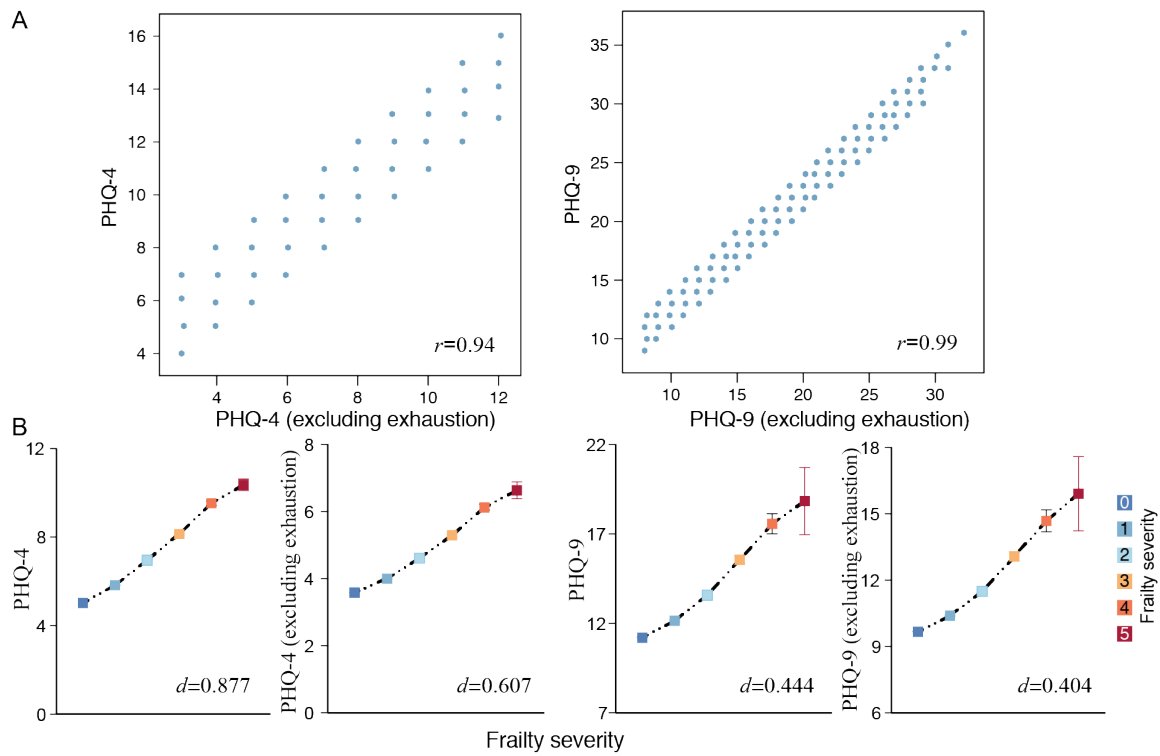

**Figure S7.** Association between physical frailty and depressive symptoms as measured by patient health questionnaire (PHQ). The four-item PHQ was used to assess the depressive symptoms at the UK Biobank assessment center and then repeated at the neuroimaging visit. A detailed and comprehensive mental health questionnaire was administered online to assess self-reported symptoms of mental disorders, where the nine-item PHQ was used to assess depressive symptoms. The PHQ-4 includes the item ‘exhaustion’ (*Field ID*: 2080), which is a component of physical frailty; the PHQ-9 includes a similar component (*Field ID*: 20519). **(A)** The PHQ scores demonstrated a high correlation between the cases with or without including the ‘exhaustion’ item ( $r[\text{PHQ-4}]=0.94$ ,  $r[\text{PHQ-9}]=0.99$ ). **(B)** The association between physical frailty and PHQ-4 was attenuated when excluding the ‘exhaustion’ item from the calculation of PHQ-4 scores (from  $d=0.877$  to  $d=0.607$ ). For PHQ-9, excluding the ‘exhaustion’ item had minimal effects on its association with physical frailty (from  $d=0.444$  to  $d=0.404$ ).

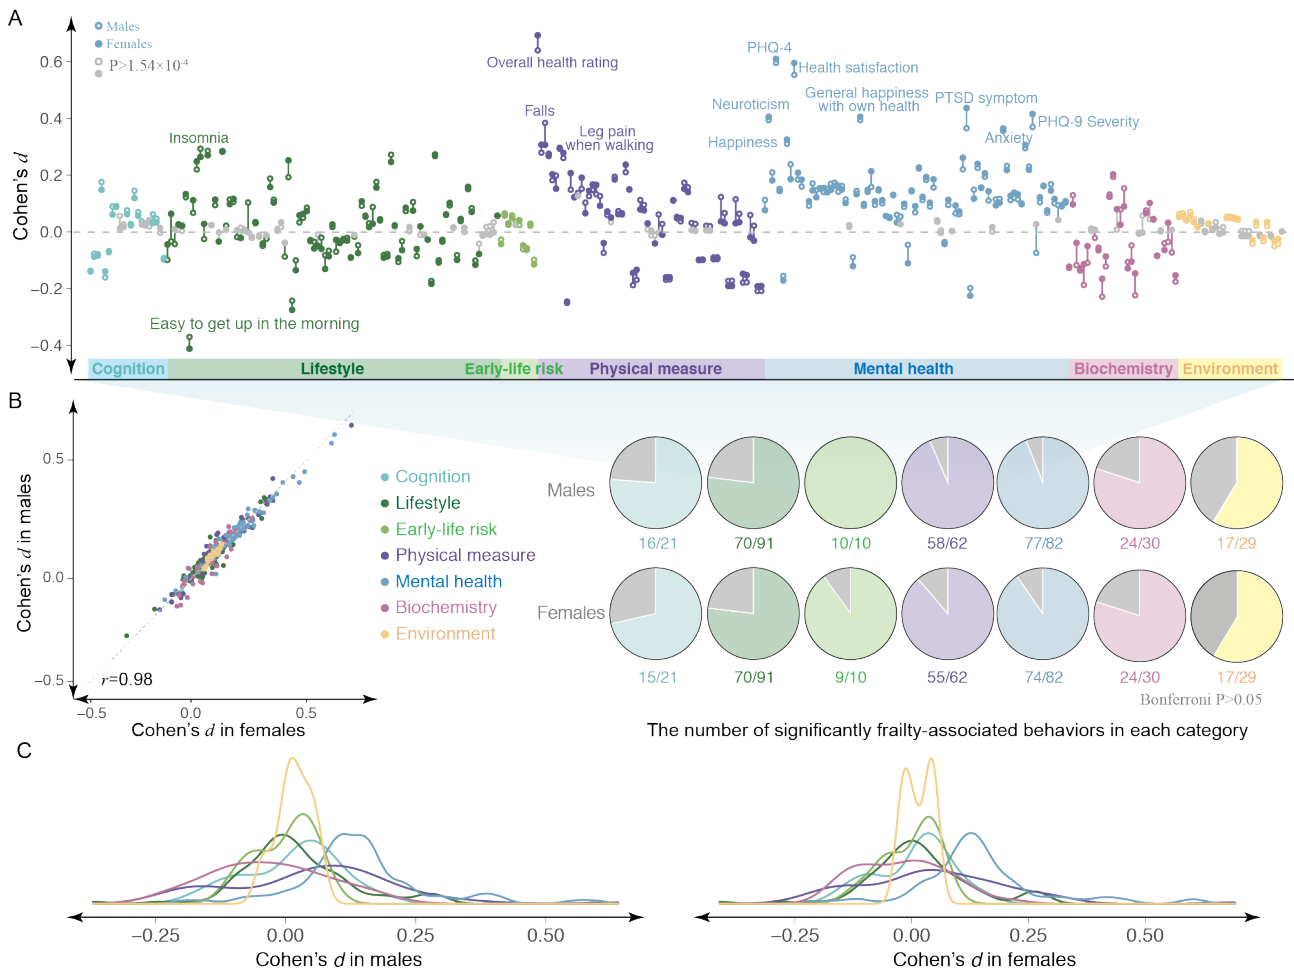

**Figure S8.** Associations between frailty and health-related measures stratified by gender. **(A)** A respective of 272 and 264 health-related measures of all 325 examined showed significant associations with physical frailty for males and females. **(B)** Association patterns were highly similar between males and females ( $r=0.97$ ). **(C)** Distributions of effect sizes of associations for males and females. Among all seven categories, mental health measures showed the strongest associations with frailty, regardless of gender.  $P < 1.54 \times 10^{-4}$ , the Bonferroni corrected level of association.

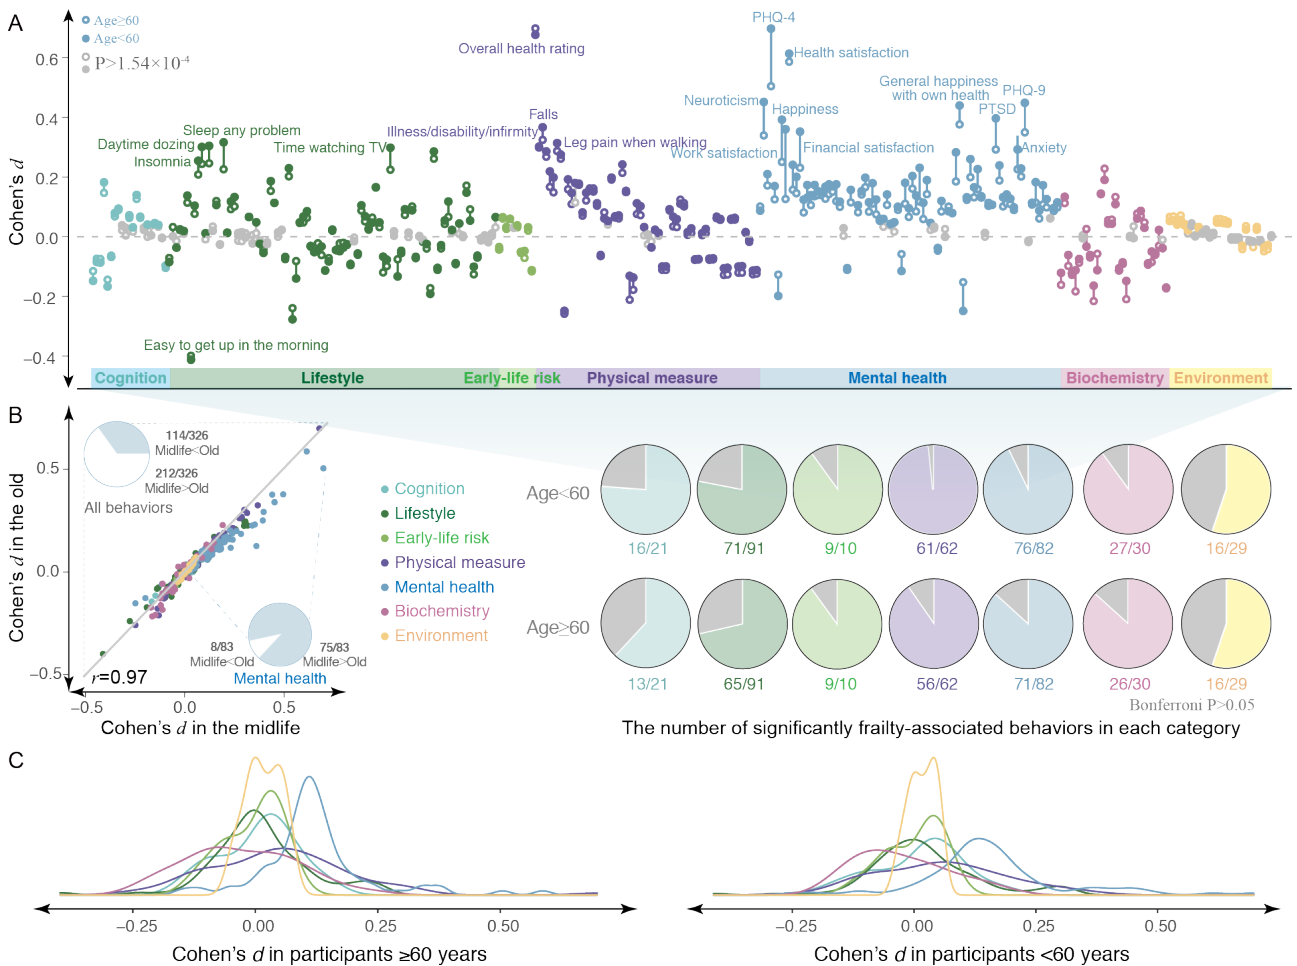

**Figure S9.** Associations between frailty and health-related measures stratified by age. To ensure an approximately comparable number of samples between subgroups, we used 60 years as the cutoff, and finally derived the midlife group (45~60 years old) and old group (>60 years old). Participants aged 45 and younger, which only accounted for a small portion of the entire samples, were excluded from the sensitivity analysis. **(A)** A respective of 276 and 256 health-related measures of all 325 examined showed significant associations with physical frailty for participants in the midlife group and old group. **(B)** Association patterns were highly similar between the two age groups ( $r=0.97$ ). Notably, people aged 45—60 years showed larger effect sizes, and larger proportion of significant associations (76/82 in midlife group, and 71/82 in old group) in mental health measures than their older counterparts. **(C)** Distributions of effect sizes of associations for these two age groups. Among all seven categories, mental health measures showed the strongest associations with frailty, regardless of age group.  $P < 1.54 \times 10^{-4}$ , the Bonferroni corrected level of association.

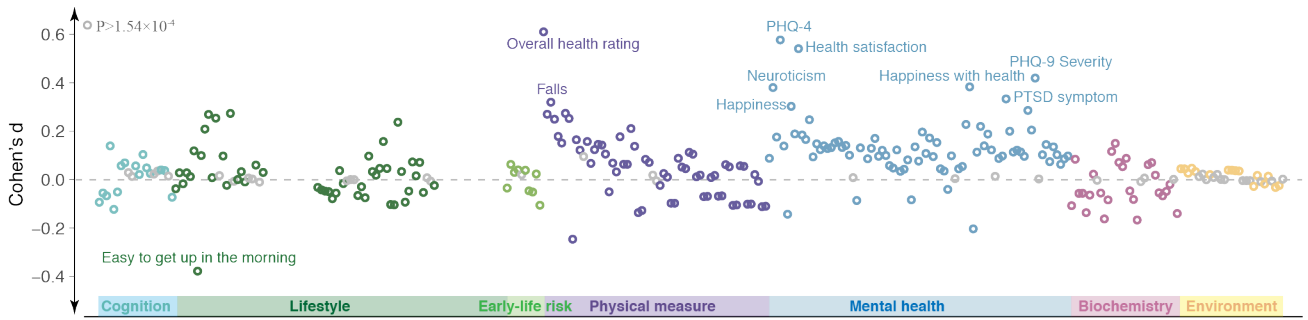

**Figure S10.** Associations between frailty and health-related measures after additionally controlling for confounders of family income, smoking status, and alcohol consumption frequency. Information about family income was not available for many participants. The average total household income was self-reported and categorized as low (<£51,999), middle (£52,000–£100,000), and high (>£10,000). Smoking status was self-reported including never, ever, and current. Alcohol intake frequency includes daily or almost daily, three or four times a week, once or twice a week, one to three times a month, special occasions only, and never. Overall, the number of participants meeting the inclusion criteria for this analysis was 11,836–416,829 per specific health measure.

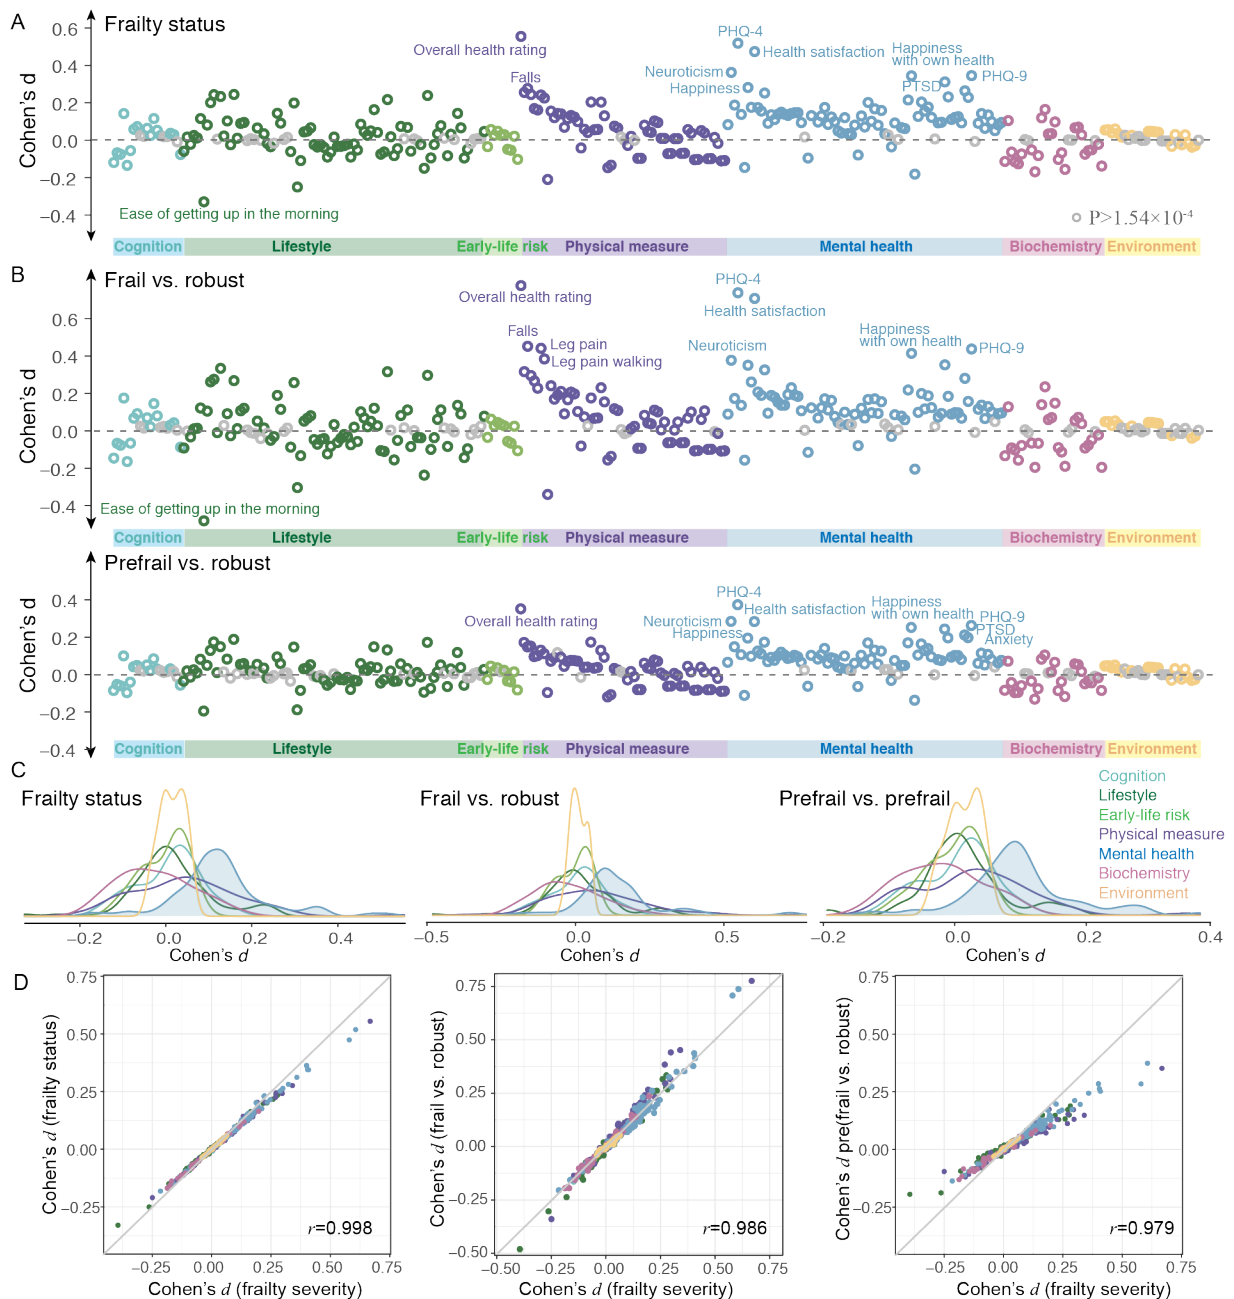

**Figure S11.** Sensitivity analyses of associations between physical frailty and health-related outcomes. Participants were classified as frail if they fulfilled three or more of the five criteria, prefrail if they fulfilled one or two criteria, and robust if they did not fulfill any criteria<sup>8-10</sup>. **(A)** Associations between physical frailty as assessed by frailty status (robust, prefrail, and frail) and health-related outcomes.  $P < 1.54 \times 10^{-4}$ , the Bonferroni corrected level of association. **(B)** Associations between physical frailty and health-related outcomes when treating frailty as a categorical variable and using robust participants as the reference group. **(C)** Distribution of effect sizes. Among all seven categories, mental health showed the strongest association with frailty. **(D)** Association patterns were highly similar between the cases treating frailty as a continuous variable (frailty severity) or categorical variable ( $r$ [frailty severity-frailty status]=0.998,  $r$ [frailty severity-frail vs. robust]=0.986,  $r$ [frailty severity-pre(frail vs. robust)]=0.979).

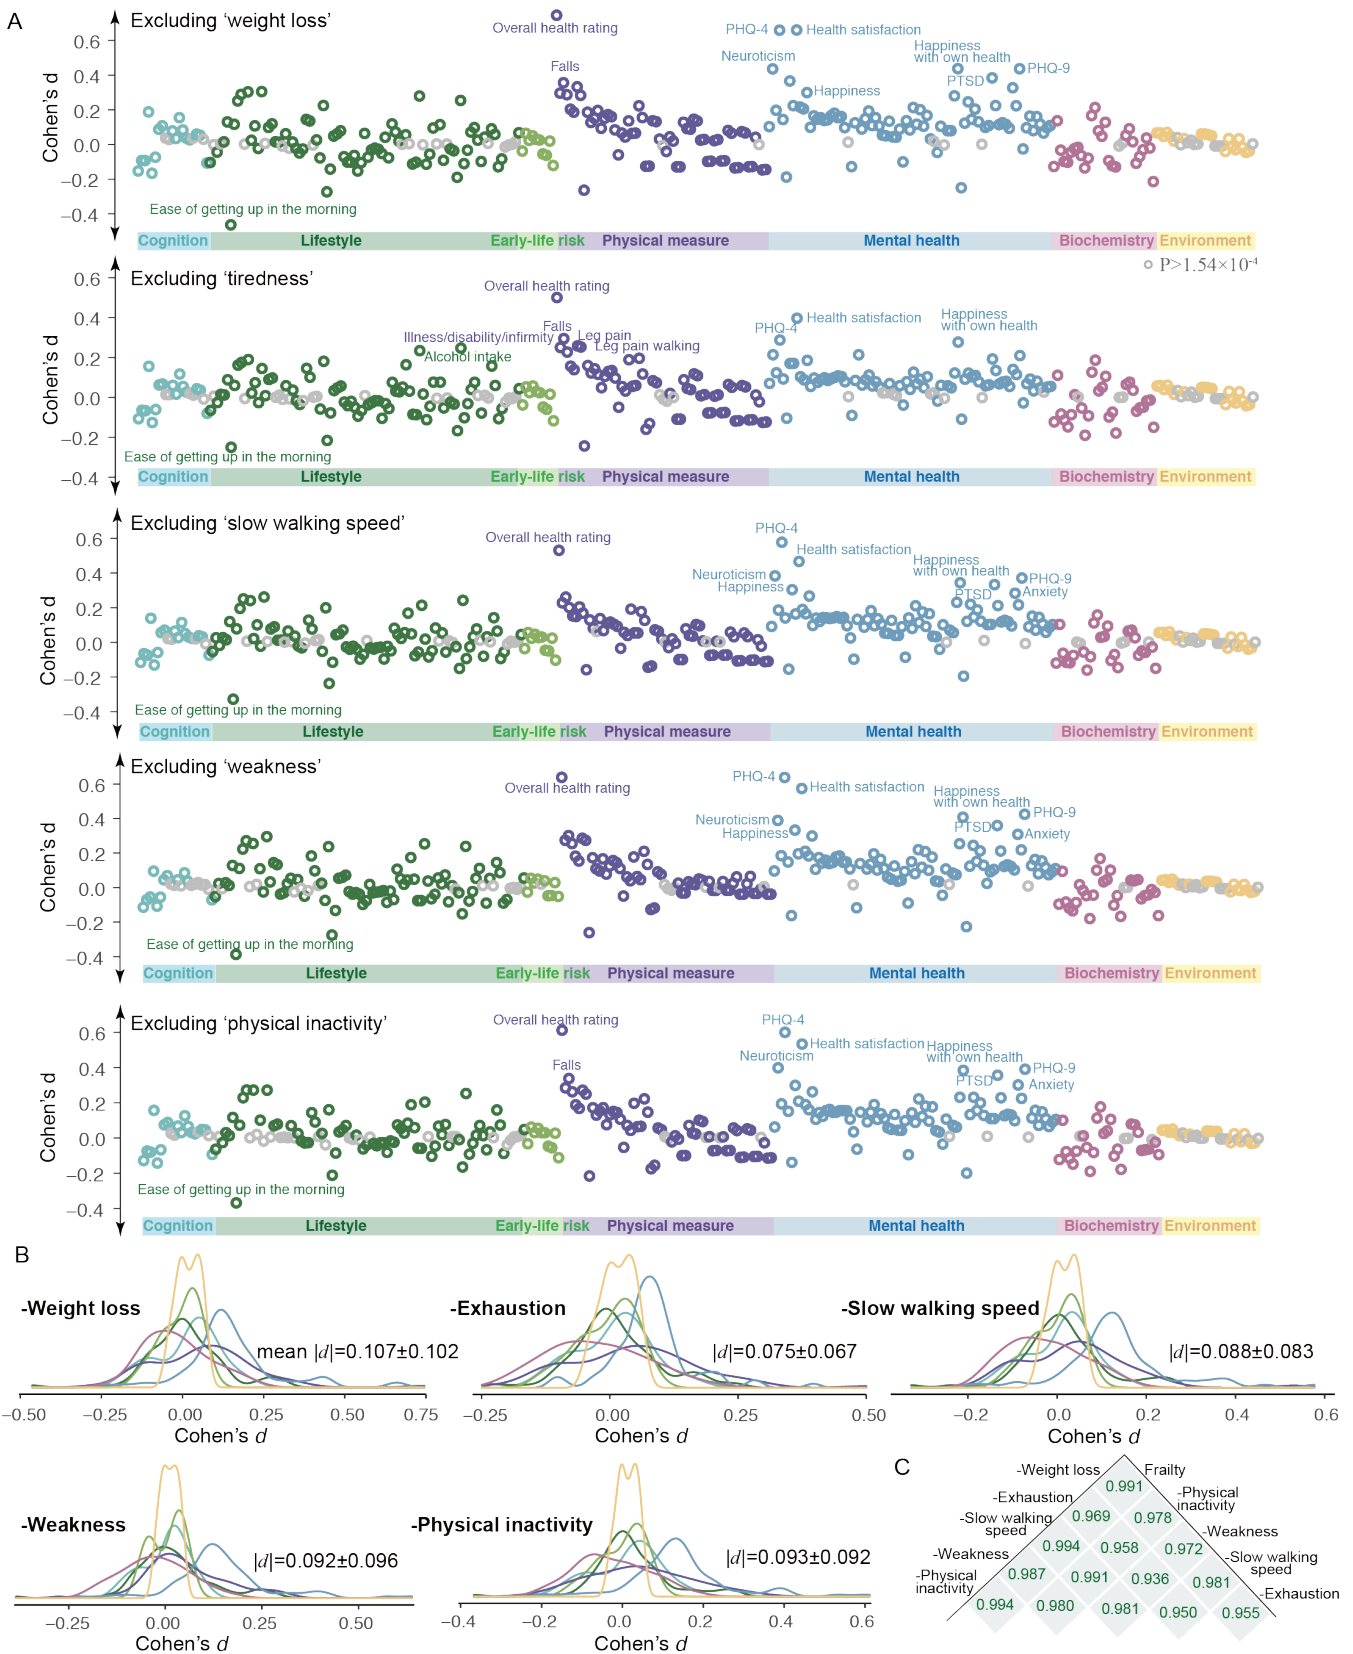

**Figure S12.** To investigate whether associations between physical frailty and health-related outcomes were merely driven by any single indicator of frailty, we excluded an indicator from the 5-indicator frailty phenotype and then fit association models. **(A)** Associations between 4-indicator physical frailty and health-related outcomes. Bonferroni correction at a significance level of  $P < 1.54 \times 10^{-4}$  was used to account for similar tests across 325 outcomes. **(B)** Distribution of effect sizes. The mean absolute effect size across 325 outcomes was  $|d| = 0.107 \pm 0.102$  (excluding weight loss),  $|d| = 0.075 \pm 0.067$  (excluding exhaustion),  $|d| = 0.088 \pm 0.083$  (excluding slow walking speed),  $|d| = 0.092 \pm 0.096$  (excluding weakness), and  $|d| = 0.093 \pm 0.092$  (excluding physical inactivity). **(C)**



Correlation of association patterns between different combinations of frailty indicators (the similarity ranged from  $r[-\text{weakness vs. -exhaustion}] = 0.0.936$  to  $r[-\text{physical inactivity vs. -slow walking speed}] = 0.994$ ). Association patterns were highly similar between cases excluding any single indicator from the frailty phenotype. Moreover, each of these association patterns was also highly correlated with that derived using 5-indicator frailty severity phenotype. This result suggests that the association between frailty severity and health-related outcomes was not driven by any single indicator. Among all conditions, excluding 'exhaustion' had the smallest effect sizes (mean  $|d| = 0.075 \pm 0.067$ ), which may suggest that this indicator was more associated with these health outcomes. In contrast, excluding 'weight loss' showed the largest effect size among all five conditions (mean  $|d| = 0.107 \pm 0.102$ ), indicating that this indicator may less relate to these health outcomes. This can be also attributed to the fact that we used self-reported weight loss, rather than the originally defined 'unintentionally loss of >10 pounds'<sup>12</sup>. Including some people who lost weight deliberately may underestimate the associations<sup>9</sup>.

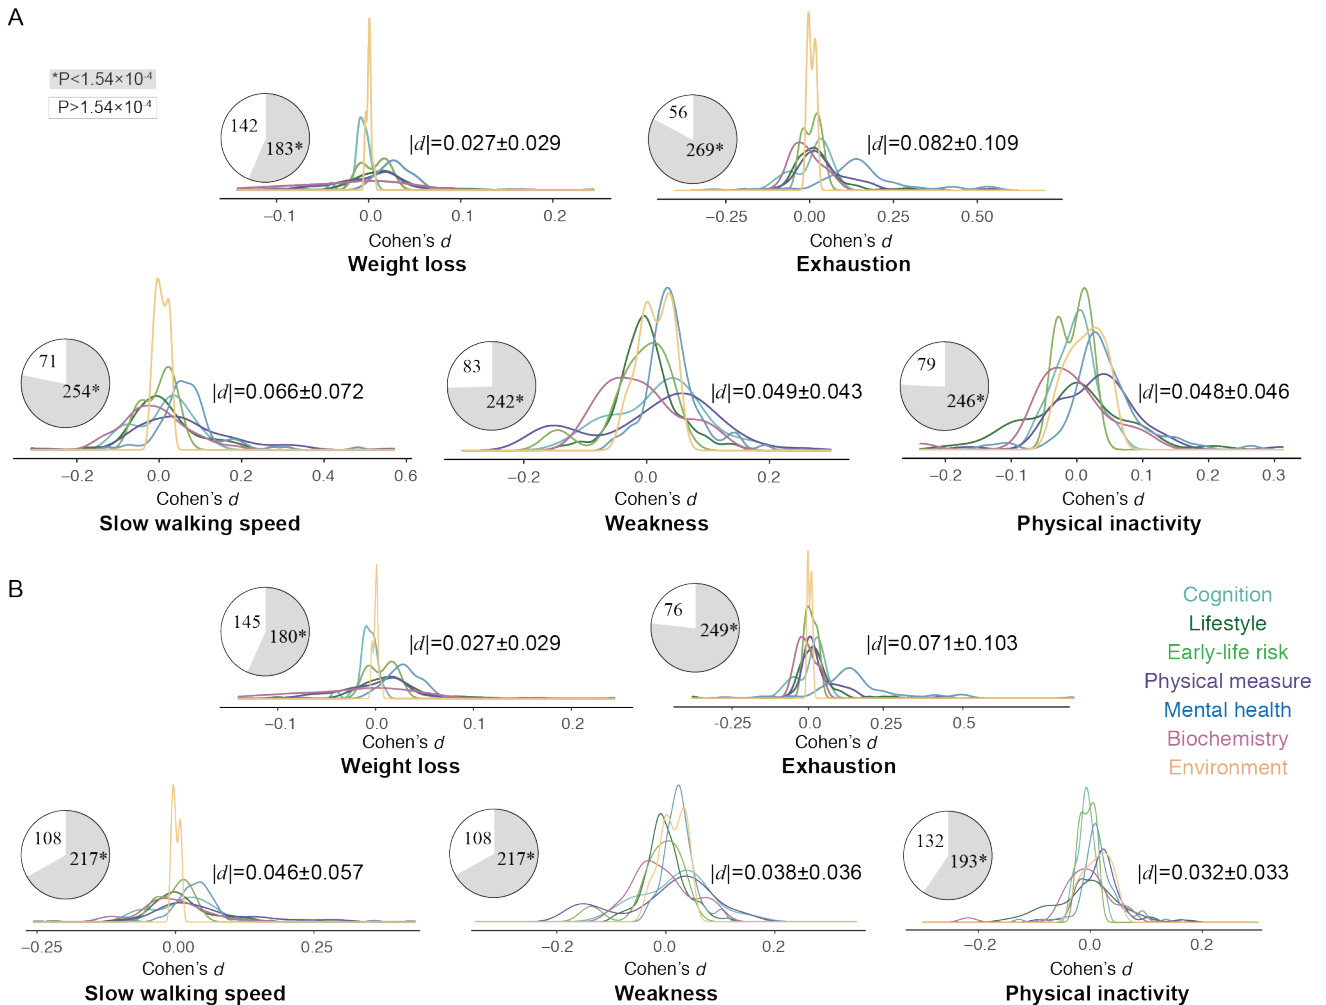

**Figure S13.** Associations between each indicator of physical frailty and health-related outcomes while controlling for numerous confounders. **(A)** We fit separate models to examine the association between each individual indicator of physical frailty and 325 health-related outcomes. The density plots show the distributions of effect sizes of associations. Among all five frailty indicators, ‘Exhaustion’ showed the strongest mean association with health-related outcomes, followed by slow walking speed; weight loss showed the lowest mean effect size. The pie charts show the number of significant/insignificant associations ( $P < 1.54 \times 10^{-4}$ , the Bonferroni corrected level of association). The number of health-related outcomes that were independently associated with each frailty indicator was  $n = 183$  (weight loss),  $n = 269$  (exhaustion),  $n = 254$  (slow walking speed),  $n = 242$  (weakness), and  $n = 246$  (physical inactivity). **(B)** We investigated the independent association of each individual frailty indicator with health-related outcomes while including mutual adjustment of the other four indicators of frailty<sup>8</sup>. The associations between each frailty indicator and health-related outcomes were attenuated following mutual adjustment of other indicators of frailty. Among all five indicators, ‘Exhaustion’ showed the strongest mean association with health-related outcomes independently of the other indicators; ‘Weight loss’ showed the lowest independent association. The number of health-related outcomes that were independently associated with each frailty indicator was  $n = 180$  (weight loss),  $n = 249$  (exhaustion),  $n = 217$  (slow walking speed),  $n = 217$  (weakness), and  $n = 193$  (physical inactivity). The magnitude of associations related to individual indicators was much lower than that related to the frailty severity (mean  $|d| = 0.10$  across 325 outcomes, Figure 2B), indicating the significance of using the frailty phenotype to characterize health-related outcomes. Overall, these results suggest that each indicator of physical frailty demonstrated an independent association with health-related outcomes, with ‘Exhaustion’ and ‘Slow walking speed’ being the most significant indicators and ‘Weight loss’ being the least significant one.

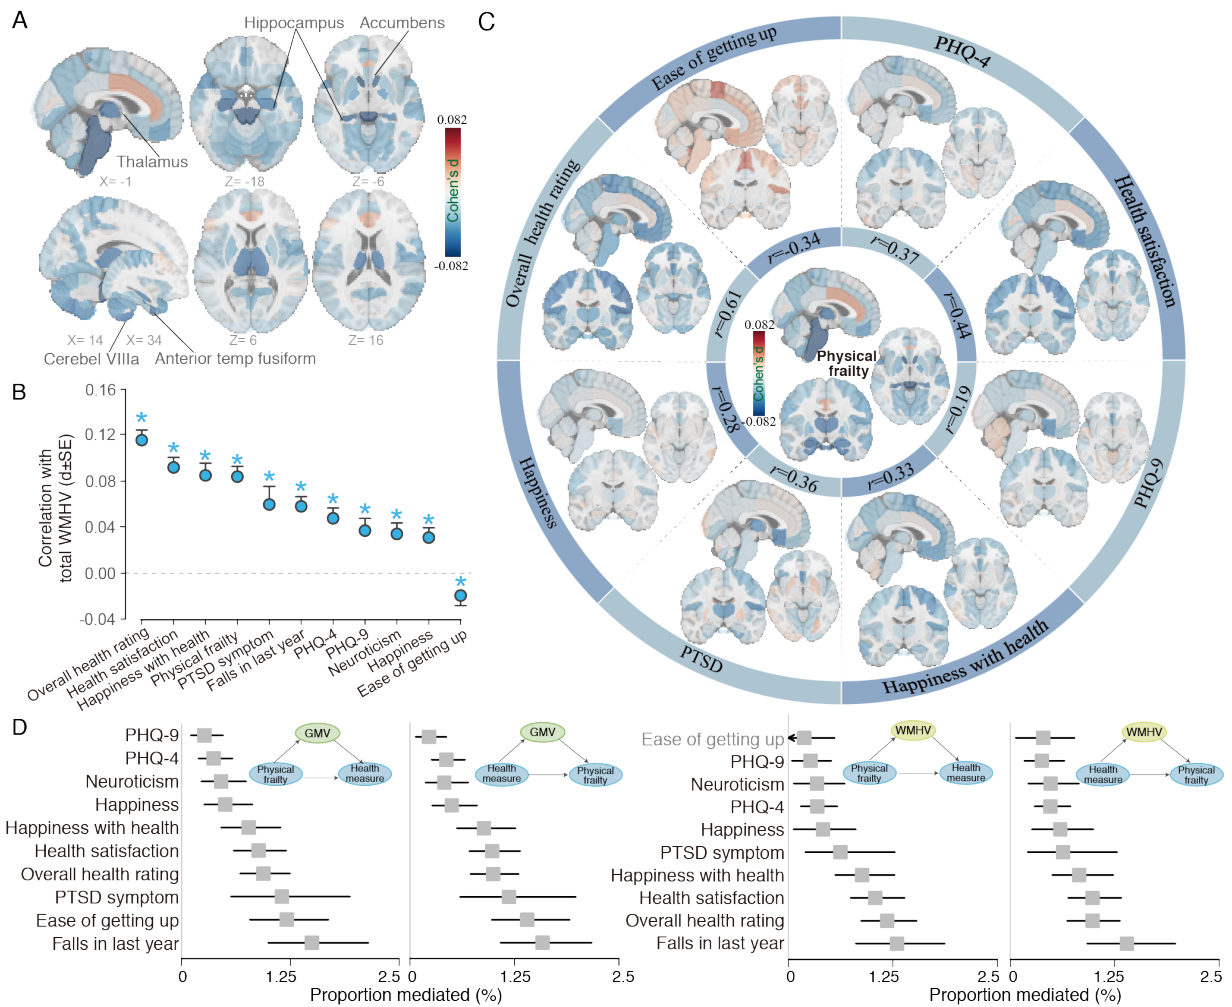

**Figure S14.** Brain structures were correlated with physical frailty and mediated the relationship between health outcomes and physical frailty. **(A)** The regional analysis revealed widespread significant associations between physical frailty and GMV while adjusting for potential confounders. **(B)** Both physical frailty and its top ten correlated health measures showed significant correlations with tWMH ( $P_{FDR} < 0.05$ ). **(C)** The association map between GMV and frailty was significantly similar to eight of the top ten frailty-correlated health measures ( $P_{FDR} < 0.05$ ). **(D)** The mean GMV of brain regions that were significantly correlated with both frailty and the health measure significantly and partially mediated the effect of frailty on all top 10 frailty-correlated health outcomes, or the effect of health outcomes on frailty, with the proportion of mediated variance ranging from 0.23% to 1.59% ( $P_{FDR} < 0.05$ ). The mediation analyses also revealed a significant indirect effect of tWMH on the association between frailty and health outcomes in both directions except for "Ease of getting up". The explained effect of tWMH ranged from 0.27% to 1.40%. GMV, grey matter volume; tWMH: total white matter hyperintensity.

**Table S4. Regional associations between GMV and physical frailty**

| Brain regions           | T-value | P <sub>FDR</sub>       | $\beta$ | 95% CI |        | Cohen's d | N      |
|-------------------------|---------|------------------------|---------|--------|--------|-----------|--------|
|                         |         |                        |         | Lower  | Upper  |           |        |
| L. accumbens            | -8.68   | 5.88×10 <sup>-16</sup> | -0.041  | -0.05  | -0.032 | -0.082    | 40,203 |
| L.thalamus              | -8.03   | 6.75×10 <sup>-14</sup> | -0.035  | -0.043 | -0.026 | -0.07     | 40,158 |
| R. accumbens            | -7.98   | 7.21×10 <sup>-14</sup> | -0.037  | -0.046 | -0.028 | -0.074    | 40,201 |
| R.thalamus              | -7.93   | 7.54×10 <sup>-14</sup> | -0.034  | -0.043 | -0.026 | -0.069    | 40,157 |
| brain_stem              | -7.89   | 8.31×10 <sup>-14</sup> | -0.04   | -0.05  | -0.03  | -0.081    | 40,158 |
| L.hippocampus           | -7.85   | 9.82×10 <sup>-14</sup> | -0.036  | -0.045 | -0.027 | -0.072    | 40,183 |
| L.temp_fusif_cortex_ant | -7.8    | 1.29×10 <sup>-13</sup> | -0.038  | -0.048 | -0.029 | -0.077    | 40,199 |
| R.temp_fusif_cortex_ant | -7.44   | 1.73×10 <sup>-12</sup> | -0.037  | -0.047 | -0.027 | -0.074    | 40,196 |
| R.cerebellum_VIIIa      | -7.03   | 3.23×10 <sup>-11</sup> | -0.033  | -0.042 | -0.024 | -0.066    | 40,200 |
| R.parahipp_gyrus_ant    | -6.8    | 1.49×10 <sup>-10</sup> | -0.034  | -0.044 | -0.024 | -0.068    | 40,187 |
| L.cerebellum_VIIIa      | -6.78   | 1.49×10 <sup>-10</sup> | -0.032  | -0.041 | -0.023 | -0.064    | 40,199 |
| R.hippocampus           | -6.51   | 9.06×10 <sup>-10</sup> | -0.03   | -0.04  | -0.021 | -0.061    | 40,174 |
| L.cerebellum_VIIIb      | -6.3    | 3.13×10 <sup>-9</sup>  | -0.03   | -0.04  | -0.021 | -0.061    | 40,202 |
| L.parahipp_gyrus_ant    | -6.29   | 3.26×10 <sup>-9</sup>  | -0.031  | -0.041 | -0.022 | -0.063    | 40,197 |
| L.cerebellum_VIIb       | -6.1    | 9.75×10 <sup>-9</sup>  | -0.029  | -0.039 | -0.02  | -0.059    | 40,196 |
| R.cerebellum_VIIb       | -6.03   | 1.45×10 <sup>-8</sup>  | -0.029  | -0.039 | -0.02  | -0.058    | 40,191 |
| R.cerebellum_VIIIb      | -5.95   | 2.18×10 <sup>-8</sup>  | -0.028  | -0.037 | -0.019 | -0.056    | 40,205 |
| L.temporal_pole         | -5.81   | 4.94×10 <sup>-8</sup>  | -0.028  | -0.038 | -0.019 | -0.057    | 40,185 |
| R.cerebellum_crus_I     | -5.79   | 5.14×10 <sup>-8</sup>  | -0.027  | -0.037 | -0.018 | -0.055    | 40,196 |
| R.pallidum              | -5.59   | 1.58×10 <sup>-7</sup>  | -0.027  | -0.037 | -0.018 | -0.055    | 40,145 |
| L.postcent_gyrus        | -5.41   | 4.21×10 <sup>-7</sup>  | -0.025  | -0.034 | -0.016 | -0.049    | 40,182 |
| L.cerebellum_crus_II    | -5.39   | 4.52×10 <sup>-7</sup>  | -0.026  | -0.035 | -0.016 | -0.051    | 40,194 |
| R.postcent_gyrus        | -5.25   | 9.00×10 <sup>-7</sup>  | -0.024  | -0.033 | -0.015 | -0.048    | 40,190 |
| L.cerebellum_crus_I     | -5.21   | 1.12×10 <sup>-6</sup>  | -0.024  | -0.034 | -0.015 | -0.049    | 40,199 |
| L.amygdala              | -5.12   | 1.75×10 <sup>-6</sup>  | -0.026  | -0.036 | -0.016 | -0.053    | 40,183 |
| L.front_med_cortex      | -5.1    | 1.86×10 <sup>-6</sup>  | -0.025  | -0.035 | -0.015 | -0.05     | 40,193 |
| L.pallidum              | -4.96   | 3.58×10 <sup>-6</sup>  | -0.025  | -0.035 | -0.015 | -0.05     | 40,124 |
| R.cent_operc_cortex     | -4.89   | 5.09×10 <sup>-6</sup>  | -0.023  | -0.033 | -0.014 | -0.046    | 40,196 |
| R.cerebellum_crus_II    | -4.87   | 5.39×10 <sup>-6</sup>  | -0.023  | -0.032 | -0.014 | -0.046    | 40,188 |
| R.temporal_pole         | -4.86   | 5.39×10 <sup>-6</sup>  | -0.024  | -0.033 | -0.014 | -0.047    | 40,185 |
| L.cerebellum_VI         | -4.6    | 1.90×10 <sup>-5</sup>  | -0.022  | -0.031 | -0.012 | -0.043    | 40,199 |
| R.sup_temp_gyrus_post   | -4.59   | 1.93×10 <sup>-5</sup>  | -0.022  | -0.032 | -0.013 | -0.045    | 40,195 |
| R.cerebellum_VI         | -4.58   | 1.94×10 <sup>-5</sup>  | -0.022  | -0.031 | -0.012 | -0.043    | 40,195 |
| R.cerebellum_IX         | -4.52   | 2.57×10 <sup>-5</sup>  | -0.022  | -0.031 | -0.012 | -0.043    | 40,206 |
| R.mid_temp_gyrus_post   | -4.46   | 3.20×10 <sup>-5</sup>  | -0.022  | -0.031 | -0.012 | -0.043    | 40,197 |
| R.precentral_gyrus      | -4.45   | 3.25×10 <sup>-5</sup>  | -0.021  | -0.03  | -0.012 | -0.041    | 40,183 |
| L.cerebellum_IX         | -4.45   | 3.30×10 <sup>-5</sup>  | -0.021  | -0.031 | -0.012 | -0.043    | 40,206 |
| R.occ_fusif_gyrus       | -4.39   | 4.07×10 <sup>-5</sup>  | -0.021  | -0.031 | -0.012 | -0.043    | 40,199 |
| R.precun_cortex         | -4.3    | 6.09×10 <sup>-5</sup>  | -0.02   | -0.03  | -0.011 | -0.041    | 40,185 |
| L.putamen               | -4.29   | 6.29×10 <sup>-5</sup>  | -0.02   | -0.029 | -0.011 | -0.04     | 40,166 |
| R.amygdala              | -4.17   | 1.03×10 <sup>-4</sup>  | -0.022  | -0.032 | -0.011 | -0.043    | 40,192 |
| R.angular_gyrus         | -4.14   | 1.16×10 <sup>-4</sup>  | -0.021  | -0.031 | -0.011 | -0.042    | 40,203 |
| R.sup_parietal_lobule   | -4.09   | 1.41×10 <sup>-4</sup>  | -0.02   | -0.03  | -0.011 | -0.041    | 40,203 |
| R.lingual_gyrus         | -4.02   | 1.86×10 <sup>-4</sup>  | -0.02   | -0.03  | -0.01  | -0.04     | 40,182 |
| L.parahipp_gyrus_post   | -4      | 1.99×10 <sup>-4</sup>  | -0.019  | -0.028 | -0.01  | -0.038    | 40,186 |
| L.lingual_gyrus         | -3.99   | 2.00×10 <sup>-4</sup>  | -0.02   | -0.03  | -0.01  | -0.04     | 40,187 |
| L.occ_fusif_gyrus       | -3.86   | 3.30×10 <sup>-4</sup>  | -0.019  | -0.029 | -0.009 | -0.038    | 40,198 |
| L.precun_cortex         | -3.85   | 3.49×10 <sup>-4</sup>  | -0.019  | -0.028 | -0.009 | -0.037    | 40,192 |
| L.mid_temp_gyrus_ant    | -3.78   | 4.54×10 <sup>-4</sup>  | -0.019  | -0.029 | -0.009 | -0.038    | 40,200 |
| R.front_med_cortex      | -3.7    | 5.98×10 <sup>-4</sup>  | -0.018  | -0.028 | -0.009 | -0.036    | 40,197 |
| L.cerebellum_X          | -3.7    | 5.90×10 <sup>-4</sup>  | -0.018  | -0.028 | -0.009 | -0.036    | 40,192 |
| L.precentral_gyrus      | -3.65   | 7.13×10 <sup>-4</sup>  | -0.017  | -0.026 | -0.008 | -0.034    | 40,188 |
| V_cerebellum_X          | -3.62   | 7.64×10 <sup>-4</sup>  | -0.017  | -0.026 | -0.008 | -0.033    | 40,204 |
| V_cerebellum_VI         | -3.61   | 8.04×10 <sup>-4</sup>  | -0.017  | -0.026 | -0.008 | -0.034    | 40,199 |

|                          |       |                        |        |        |        |        |        |
|--------------------------|-------|------------------------|--------|--------|--------|--------|--------|
| R.putamen                | -3.52 | $1.08 \times 10^{-03}$ | -0.017 | -0.026 | -0.007 | -0.033 | 40,156 |
| R.inf_temp_gyrus_tempocc | -3.51 | $1.09 \times 10^{-03}$ | -0.018 | -0.028 | -0.008 | -0.036 | 40,203 |
| L.cing_gyrus_ant         | 3.5   | $1.12 \times 10^{-03}$ | 0.018  | 0.008  | 0.028  | 0.036  | 40,177 |
| V_cerebellum_crus_II     | -3.45 | $1.32 \times 10^{-03}$ | -0.017 | -0.027 | -0.007 | -0.034 | 40,202 |
| L.inf_temp_gyrus_ant     | -3.44 | $1.38 \times 10^{-03}$ | -0.017 | -0.027 | -0.007 | -0.035 | 40,202 |
| R.heschl_gyrus           | -3.4  | $1.56 \times 10^{-03}$ | -0.016 | -0.025 | -0.007 | -0.032 | 40,196 |
| L.cerebellum_V           | -3.36 | $1.79 \times 10^{-03}$ | -0.016 | -0.026 | -0.007 | -0.033 | 40,193 |
| R.temp_occ_fusif_cortex  | -3.34 | $1.90 \times 10^{-03}$ | -0.017 | -0.027 | -0.007 | -0.034 | 40,194 |
| L.front_orb_cortex       | -3.27 | $2.40 \times 10^{-03}$ | -0.015 | -0.025 | -0.006 | -0.031 | 40,186 |
| L.insular_cortex         | -3.2  | $3.02 \times 10^{-03}$ | -0.015 | -0.025 | -0.006 | -0.031 | 40,164 |
| L.mid_temp_gyrus_post    | -3.19 | $3.02 \times 10^{-03}$ | -0.016 | -0.025 | -0.006 | -0.031 | 40,191 |
| R.insular_cortex         | -3.15 | $3.45 \times 10^{-03}$ | -0.015 | -0.025 | -0.006 | -0.031 | 40,162 |
| R.sup_temp_gyrus_ant     | -3.09 | $4.05 \times 10^{-03}$ | -0.016 | -0.025 | -0.006 | -0.031 | 40,201 |
| R.paracing_gyrus         | -3.09 | $4.05 \times 10^{-03}$ | -0.014 | -0.023 | -0.005 | -0.029 | 40,190 |
| L.temp_occ_fusif_cortex  | -3.09 | $4.07 \times 10^{-03}$ | -0.016 | -0.026 | -0.006 | -0.031 | 40,199 |
| L.subcallosal_cortex     | -3.07 | $4.26 \times 10^{-03}$ | -0.015 | -0.025 | -0.005 | -0.03  | 40,180 |
| R.parahipp_gyrus_post    | -3.06 | $4.28 \times 10^{-03}$ | -0.015 | -0.024 | -0.005 | -0.029 | 40,193 |
| L.cent_operc_cortex      | -2.94 | $6.26 \times 10^{-03}$ | -0.014 | -0.023 | -0.005 | -0.028 | 40,195 |
| L.supramarg_gyrus_post   | -2.9  | $7.13 \times 10^{-03}$ | -0.015 | -0.025 | -0.005 | -0.029 | 40,198 |
| R.inf_temp_gyrus_ant     | -2.87 | $7.64 \times 10^{-03}$ | -0.015 | -0.024 | -0.005 | -0.029 | 40,202 |
| L.paracing_gyrus         | -2.84 | $8.24 \times 10^{-03}$ | -0.013 | -0.023 | -0.004 | -0.027 | 40,189 |

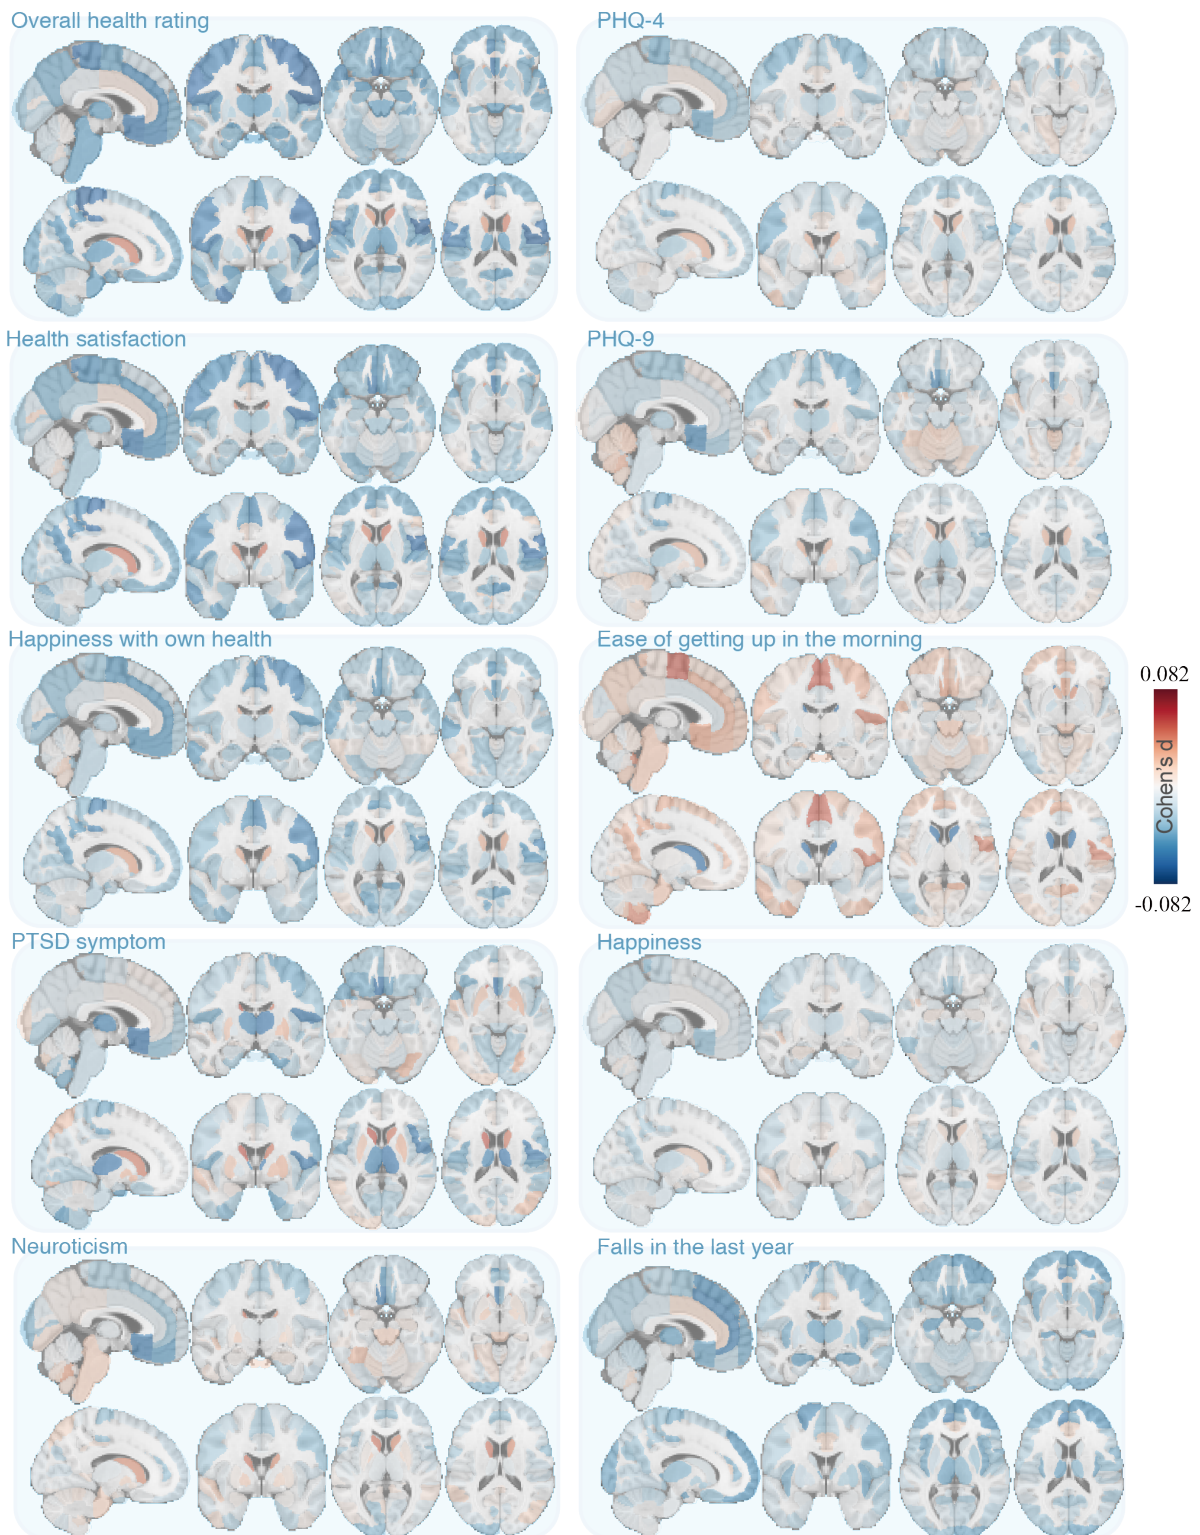

**Figure S15.** Regional distribution of associations between grey matter volume and the top ten frailty-correlated health measures. The similarity of association map between frailty and these health measures were: overall health rating ( $r=0.61$ ,  $P=9.74 \times 10^{-15}$ ), PHQ-4 ( $r=0.37$ ,  $P=2.06 \times 10^{-5}$ ), health satisfaction ( $r=0.44$ ,  $P=3.22 \times 10^{-7}$ ), happiness with own health ( $r=0.61$ ,  $P=9.74 \times 10^{-15}$ ), PHQ-9 ( $r=0.33$ ,  $P=1.17 \times 10^{-4}$ ), neuroticism ( $r=-0.004$ ,  $P=0.97$ ), ease of getting up in the morning ( $r=-0.34$ ,  $P=7.26 \times 10^{-5}$ ), PTSD ( $r=0.36$ ,  $P=2.54 \times 10^{-5}$ ), falls ( $r=0.10$ ,  $P=0.25$ ), and general happiness ( $r=0.28$ ,  $P=1.30 \times 10^{-3}$ ). All P-values were FDR corrected.

**Table S5. Associations between white matter hyperintensities and health-related measures**

| Behavior                  | No.    | Cohen's<br><i>d</i> | $\beta$ | 95% CI |        | T-<br>value | $P_{FDR}$              |
|---------------------------|--------|---------------------|---------|--------|--------|-------------|------------------------|
|                           |        |                     |         | Lower  | Upper  |             |                        |
| Frailty                   | 38,927 | 0.084               | 0.042   | 0.033  | 0.051  | 9.50        | $7.71 \times 10^{-21}$ |
| Overall health rating     | 39,139 | 0.116               | 0.058   | 0.049  | 0.067  | 13.08       | $6.09 \times 10^{-38}$ |
| PHQ-4                     | 37,354 | 0.048               | 0.024   | 0.015  | 0.033  | 5.45        | $1.16 \times 10^{-07}$ |
| Health satisfaction       | 39,112 | 0.092               | 0.046   | 0.037  | 0.055  | 10.50       | $5.61 \times 10^{-25}$ |
| PHQ-9                     | 26,617 | 0.039               | 0.019   | 0.009  | 0.030  | 3.66        | $3.43 \times 10^{-04}$ |
| Happiness with own health | 26,940 | 0.086               | 0.043   | 0.033  | 0.053  | 8.10        | $1.09 \times 10^{-15}$ |
| Neuroticism               | 32,076 | 0.034               | 0.017   | 0.008  | 0.027  | 3.58        | $3.77 \times 10^{-04}$ |
| Easy to get up            | 39,172 | -0.020              | -0.010  | -0.018 | -0.001 | -2.22       | $2.70 \times 10^{-02}$ |
| PTSD symptom              | 11,544 | 0.060               | 0.030   | 0.014  | 0.045  | 3.76        | $2.54 \times 10^{-04}$ |
| Falls in the last year    | 39,150 | 0.058               | 0.030   | 0.021  | 0.038  | 6.80        | $1.04 \times 10^{-11}$ |
| Happiness                 | 39,070 | 0.032               | 0.015   | 0.007  | 0.024  | 3.64        | $3.77 \times 10^{-04}$ |

PHQ-4: patient health questionnaire-4; PTSD: post-traumatic stress disorder symptom.

**Table S6. Results of the mediation analyses between frailty, health measures, and mean grey matter volume**

|                                                                                        | $P_{FDR}$            | Prop. Mediated (%) | 95% CI Lower-Upper |       | Total No. |
|----------------------------------------------------------------------------------------|----------------------|--------------------|--------------------|-------|-----------|
| <i>Predictor: frailty; Response: behavioral outcomes; Mediator: grey matter volume</i> |                      |                    |                    |       |           |
| PHQ-9                                                                                  | $<2 \times 10^{-4}$  | 0.263              | 0.107              | 0.477 | 27,322    |
| PHQ-4                                                                                  | $4.0 \times 10^{-4}$ | 0.369              | 0.193              | 0.586 | 38,375    |
| Neuroticism                                                                            | $<2 \times 10^{-4}$  | 0.454              | 0.228              | 0.74  | 32,937    |
| Happiness                                                                              | $<2 \times 10^{-4}$  | 0.502              | 0.262              | 0.813 | 40,090    |
| Happiness with own health                                                              | $<2 \times 10^{-4}$  | 0.772              | 0.455              | 1.138 | 27,664    |
| Health satisfaction                                                                    | $<2 \times 10^{-4}$  | 0.885              | 0.599              | 1.202 | 40,130    |
| Overall health rating                                                                  | $<2 \times 10^{-4}$  | 0.941              | 0.673              | 1.245 | 40,163    |
| PTSD symptom                                                                           | $<2 \times 10^{-4}$  | 1.153              | 0.57               | 1.935 | 11,866    |
| Easy to get up                                                                         | $<2 \times 10^{-4}$  | 1.21               | 0.786              | 1.686 | 40,184    |
| Falls in last year                                                                     | $<2 \times 10^{-4}$  | 1.498              | 0.996              | 2.147 | 40,179    |
| <i>Predictor: behavioral outcomes; Response: frailty; Mediator: grey matter volume</i> |                      |                    |                    |       |           |
| PHQ-9                                                                                  | $5.2 \times 10^{-3}$ | 0.228              | 0.068              | 0.436 | 27,322    |
| Neuroticism                                                                            | $4.4 \times 10^{-4}$ | 0.41               | 0.187              | 0.698 | 32,937    |
| PHQ-4                                                                                  | $<2 \times 10^{-4}$  | 0.435              | 0.258              | 0.658 | 38,375    |
| Happiness                                                                              | $<2 \times 10^{-4}$  | 0.499              | 0.265              | 0.802 | 40,090    |
| Happiness with own health                                                              | $<2 \times 10^{-4}$  | 0.885              | 0.561              | 1.262 | 27,664    |
| Health satisfaction                                                                    | $<2 \times 10^{-4}$  | 0.983              | 0.711              | 1.318 | 40,130    |
| Overall health rating                                                                  | $<2 \times 10^{-4}$  | 0.995              | 0.724              | 1.3   | 40,163    |
| PTSD symptom                                                                           | $<2 \times 10^{-4}$  | 1.185              | 0.599              | 1.984 | 11,866    |
| Easy to get up                                                                         | $<2 \times 10^{-4}$  | 1.402              | 0.978              | 1.911 | 40,184    |
| Falls in last year                                                                     | $<2 \times 10^{-4}$  | 1.586              | 1.083              | 2.174 | 40,179    |

We first investigated the association between physical frailty and 325 health-related measures and extracted the top-ten highly-correlated measures. Then, we examined the association of regional GMVs/tWMH with physical frailty and the top ten health measures. After that, for each of the ten health measures, we extracted the overlapped brain GMV that were significantly correlated with both frailty and the health measure of interest. For each health measure, we performed mediation analysis in R, where frailty was used as the independent variable, health measure as the dependent variable, and tWMH/mean GMV of brain regions that were significantly correlated with both frailty and the health measure constituted the mediator.



**Table S7. Results of the mediation analyses between frailty, health measures, and white matter hyperintensities**

|                                                                                                   | $P_{FDR}$            | Prop. Mediated (%) | 95% CI |       | Total No. |
|---------------------------------------------------------------------------------------------------|----------------------|--------------------|--------|-------|-----------|
|                                                                                                   |                      |                    | Lower  | Upper |           |
| <i>Predictor: frailty; Response: behavioral outcomes; Mediator: white matter hyperintensities</i> |                      |                    |        |       |           |
| Easy to get up                                                                                    | 0.30                 | 0.189              | -0.148 | 0.554 | 38,903    |
| PHQ-9                                                                                             | $2.2 \times 10^{-2}$ | 0.265              | 0.043  | 0.513 | 26,441    |
| Neuroticism                                                                                       | $2.2 \times 10^{-2}$ | 0.342              | 0.064  | 0.673 | 31,906    |
| PHQ-4                                                                                             | $8.0 \times 10^{-4}$ | 0.345              | 0.148  | 0.586 | 37,145    |
| Happiness                                                                                         | $2.2 \times 10^{-2}$ | 0.414              | 0.061  | 0.805 | 38,813    |
| PTSD symptom                                                                                      | $2.7 \times 10^{-3}$ | 0.622              | 0.202  | 1.275 | 11,465    |
| Happiness with own health                                                                         | $<2 \times 10^{-4}$  | 0.882              | 0.56   | 1.271 | 26,775    |
| Health satisfaction                                                                               | $<2 \times 10^{-4}$  | 1.04               | 0.746  | 1.391 | 38,851    |
| Overall health rating                                                                             | $<2 \times 10^{-4}$  | 1.182              | 0.869  | 1.535 | 38,883    |
| Falls in last year                                                                                | $<2 \times 10^{-4}$  | 1.299              | 0.808  | 1.87  | 38,898    |
| <i>Predictor: behavioral outcomes; Response: frailty; Mediator: white matter hyperintensities</i> |                      |                    |        |       |           |
| PHQ-9                                                                                             | $5.0 \times 10^{-4}$ | 0.378              | 0.169  | 0.648 | 26,441    |
| Easy to get up                                                                                    | $1.4 \times 10^{-2}$ | 0.395              | 0.064  | 0.769 | 38,903    |
| PHQ-4                                                                                             | $<2 \times 10^{-4}$  | 0.48               | 0.291  | 0.722 | 37,145    |
| Neuroticism                                                                                       | $5.0 \times 10^{-4}$ | 0.483              | 0.216  | 0.822 | 31,906    |
| Happiness                                                                                         | $5.0 \times 10^{-4}$ | 0.599              | 0.26   | 0.995 | 38,813    |
| PTSD symptom                                                                                      | $1.3 \times 10^{-3}$ | 0.631              | 0.21   | 1.279 | 11,465    |
| Happiness with own health                                                                         | $<2 \times 10^{-4}$  | 0.825              | 0.503  | 1.232 | 26,775    |
| Health satisfaction                                                                               | $<2 \times 10^{-4}$  | 0.985              | 0.694  | 1.329 | 38,851    |
| Overall health rating                                                                             | $<2 \times 10^{-4}$  | 0.986              | 0.681  | 1.313 | 38,883    |
| Falls in last year                                                                                | $<2 \times 10^{-4}$  | 1.396              | 0.922  | 1.976 | 38,898    |

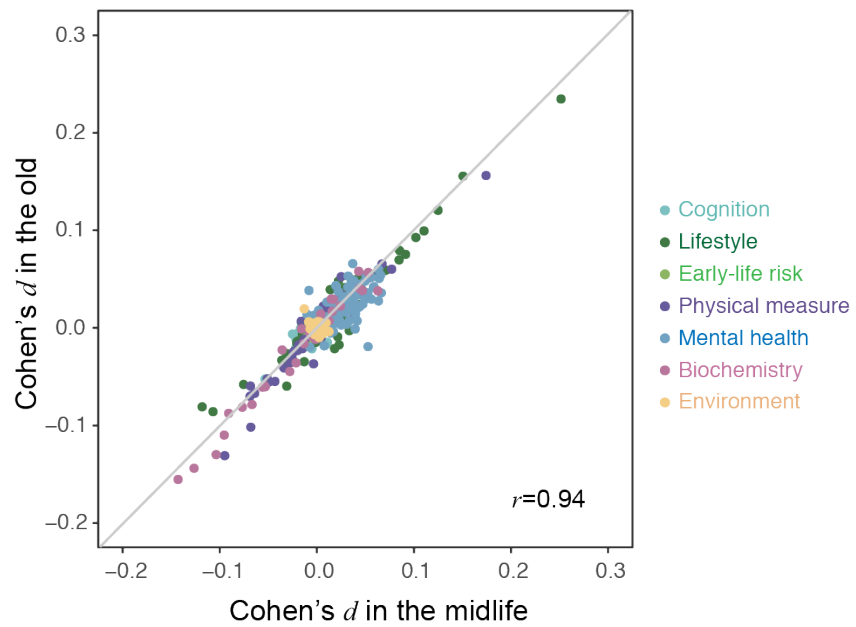

**Figure S16.** Associations between weight loss and health-related outcomes stratified by age. We reran association analysis to examine how weight loss relates to 325 health-related outcomes for middle-aged (45~60 years old) and older adults (>60 years old), separately. Results showed that the association patterns were highly similar between middle-aged and older adults ( $r=0.94$ ).

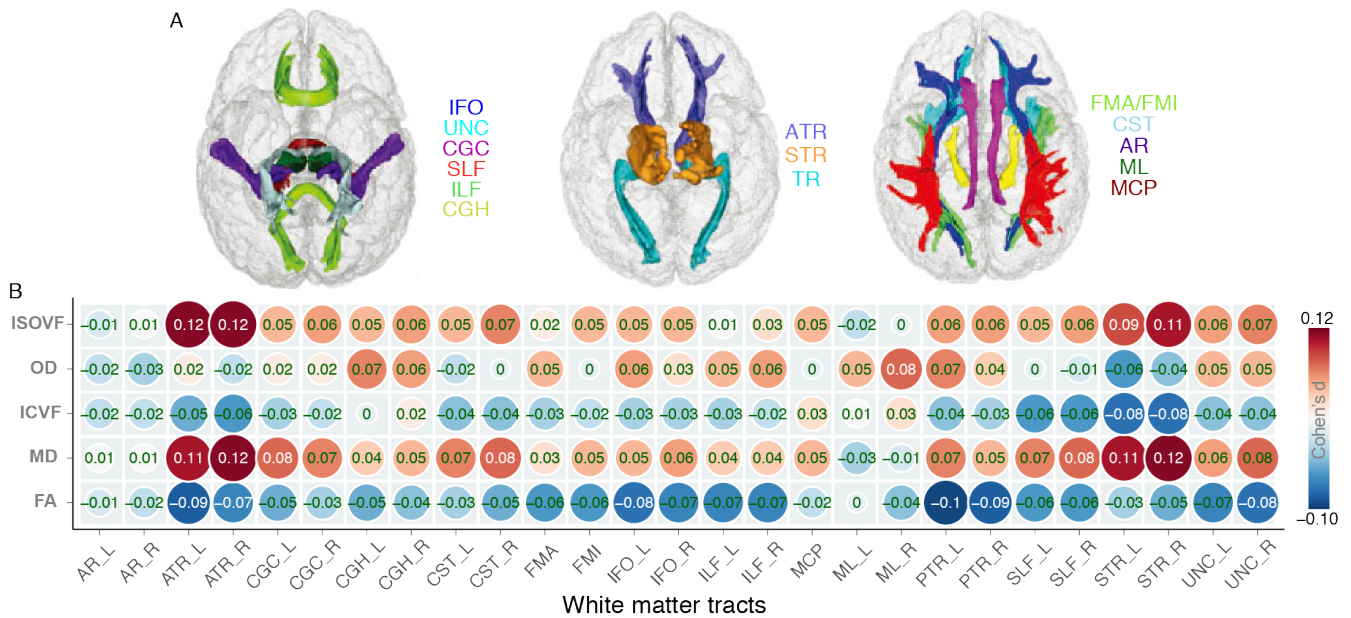

**Figure S17.** Associations between physical frailty and white matter microstructure indices across white matter tract regions while controlling for potential confounders. **(A)** White matter tracts of interest were generated using probabilistic tractography. This figure was adapted and modified from Cox et al.<sup>13</sup>. Imaging processing of DTI data can be found in <sup>2</sup>. **(B)** Generally, the physical frailty showed primarily negative associations with regional FA and ICVF, but positive associations with MD, OD, and ISOVF. Specifically, white matter tracts showing the strongest associations mainly included FA in PTR, ATR, IFO, and UNC; MD in STR and ATR; ICVF in STR; OD in ML; ISOVF in ATR and STR.

Field IDs for these indices in UK Biobank were:

FA: 25488–25514;

MD: 25515–25541;

ICVF: 25650–25676;

OD: 25677–25703;

ISOVF: 25704–25730.

Abbreviation: FA: fractional anisotropy; ICVF: intracellular volume fraction; ISOVF: isotropic volume fraction; MD: mean diffusivity; OD: orientation dispersion; L: right; R: left; AR: acoustic radiation; ATR: anterior thalamic radiation; CGC, cingulate gyrus part of cingulum; CGH: parahippocampal part of cingulum; CST: corticospinal tract; FMA: forceps major; FMI: forceps minor; IFO: inferior fronto-occipital fasciculus; ILF: inferior longitudinal fasciculus; MCP: middle cerebellar peduncle; ML: medial lemniscus; PTR: posterior thalamic radiation; SLF: superior longitudinal fasciculus; STR: superior thalamic radiation; UNC: uncinata fasciculus.

**Table S8. Baseline characteristic of participants in those with/without neuroimaging data at a 9-year follow-up**

|                                                     | Without neuroimaging data | With neuroimaging data   | P for difference |
|-----------------------------------------------------|---------------------------|--------------------------|------------------|
| Total N                                             | 441,174                   | 41,859                   |                  |
| Age (mean $\pm$ sd)                                 | 56.65 $\pm$ 8.12          | 55.01 $\pm$ 7.54         | <0.001           |
| range                                               | 38~73                     | 40~70                    |                  |
| Sex, N/%                                            |                           |                          | <0.001           |
| Female                                              | 240,716/54.56             | 22,068/51.41             |                  |
| Male                                                | 200,458/45.44             | 19,791/47.28             |                  |
| Ethnicity, N/%                                      |                           |                          | <0.001           |
| White                                               | 416,822/94.48             | 40,535/96.84             |                  |
| Non-White                                           | 24,352/5.52               | 1,324/3.16               |                  |
| Body mass index (kg/m <sup>2</sup> , mean $\pm$ sd) | 27.48 $\pm$ 4.81          | 26.55 $\pm$ 4.22         | <0.001           |
| Waist-to-hip ratio (mean $\pm$ sd)                  | 0.87 $\pm$ 0.090          | 0.86 $\pm$ 0.087         | <0.001           |
| Data acquisition date (range)                       | 12/19/2006<br>10/01/2010  | 04/16/2007<br>10/01/2010 | NA               |
| Townsend deprivation index (mean $\pm$ sd)          | -1.29 $\pm$ 3.09          | -1.88 $\pm$ 2.73         | <0.001           |
| Average total household income, N/%                 |                           |                          | <0.001           |
| Low (<£51,999)                                      | 284,153/64.41             | 24,484/58.49             |                  |
| Middle (£52,000–£100,000)                           | 74,561/16.90              | 10,874/25.98             |                  |
| High (>£100,000)                                    | 19,737/4.47               | 3,020/7.21               |                  |
| Unknown                                             | 62,723/13.71              | 3,481/8.32               |                  |
| Education levels, N/%                               |                           |                          | <0.001           |
| College/University                                  | 139,333/31.58             | 19,653/46.95             |                  |
| Less than College                                   | 301,841/68.42             | 22,206/53.05             |                  |
| Smoking status, N/%                                 |                           |                          | <0.001           |
| Never                                               | 238,457/54.05             | 25,414/60.71             |                  |
| Ever                                                | 153,546/34.80             | 13,785/32.93             |                  |
| Current                                             | 47,670/10.81              | 2,589/6.19               |                  |
| Unknown                                             | 1,501/0.34                | 71/0.17                  |                  |
| Alcohol intake frequency, N/%                       |                           |                          | <0.001           |
| Daily or almost daily                               | 89,676/20.33              | 9,505/22.71              |                  |
| Three or four times a week                          | 100,721/22.83             | 11,757/28.09             |                  |
| Once or twice a week                                | 114,244/25.90             | 10,739/25.66             |                  |
| One to three times a month                          | 49,367/11.19              | 4,551/10.87              |                  |
| Special occasions only                              | 51,395/11.65              | 3,378/8.07               |                  |
| Never                                               | 35,456/8.04               | 1,923/4.59               |                  |
| Unknown                                             | 315/0.07                  | 6/0.01                   |                  |
| Frailty severity, N/%                               |                           |                          | <0.001           |
| 0                                                   | 239,773/54.35             | 27,318/65.26             |                  |
| 1                                                   | 136,930/31.04             | 11,606/27.73             |                  |
| 2                                                   | 44,982/10.20              | 2,388/5.70               |                  |
| 3                                                   | 14,468/3.28               | 450/1.08                 |                  |
| 4                                                   | 4,427/1.00                | 86/0.21                  |                  |
| 5                                                   | 594/0.13                  | 11/0.03                  |                  |

The current study included 483,033 participants at the baseline visit, among whom 41,859 participants have MRI data collected at the imaging visit. Only participants with complete data available for frailty and basic demographic characteristics were analyzed here. Further, the samples with neuroimaging data were derived before performing any outlying data exclusion. Participants included in MRI scanning were more likely to be frail, have healthier behavior (but less likely to never or only occasionally drink alcohol), and have a higher socioeconomic status, indicating selection bias<sup>14</sup>.

## References

1. Petermann-Rocha F, Hanlon P, Gray SR, et al. Comparison of two different frailty measurements and risk of hospitalisation or death from COVID-19: findings from UK Biobank. *BMC medicine* 2020; **18**(1): 355.
2. Alfaro-Almagro F, Jenkinson M, Bangerter NK, et al. Image processing and Quality Control for the first 10,000 brain imaging datasets from UK Biobank. *Neuroimage* 2018; **166**: 400-24.
3. Gray JC, Thompson M, Bachman C, Owens MM, Murphy M, Palmer R. Associations of cigarette smoking with gray and white matter in the UK Biobank. *Neuropsychopharmacology* 2020; **45**(7): 1215-22.
4. Daviet R, Aydogan G, Jagannathan K, et al. Associations between alcohol consumption and gray and white matter volumes in the UK Biobank. *Nat Commun* 2022; **13**(1): 1-11.
5. Dekkers IA, Jansen PR, Lamb HJ. Obesity, brain volume, and white matter microstructure at MRI: a cross-sectional UK Biobank study. *Radiology* 2019; **291**(3): 763-71.
6. Antal B, McMahon LP, Sultan SF, et al. Type 2 diabetes mellitus accelerates brain aging and cognitive decline: Complementary findings from UK Biobank and meta-analyses. *eLife* 2022; **11**.
7. Jiang R, Westwater ML, Noble S, et al. Associations between grip strength, brain structure, and mental health in > 40,000 participants from the UK Biobank. *BMC medicine* 2022; **20**(1): 1-14.
8. Petermann-Rocha F, Lyall DM, Gray SR, et al. Associations between physical frailty and dementia incidence: a prospective study from UK Biobank. *The Lancet Healthy Longevity* 2020; **1**(2): e58-e68.
9. Hanlon P, Nicholl BI, Jani BD, Lee D, McQueenie R, Mair FS. Frailty and pre-frailty in middle-aged and older adults and its association with multimorbidity and mortality: a prospective analysis of 493 737 UK Biobank participants. *Lancet Public Health* 2018; **3**(7): e323-e32.
10. Hoogendijk EO, Afilalo J, Ensrud KE, Kowal P, Onder G, Fried LP. Frailty: implications for clinical practice and public health. *Lancet* 2019; **394**(10206): 1365-75.
11. Dent E, Martin FC, Bergman H, Woo J, Romero-Ortuno R, Walston JD. Management of frailty: opportunities, challenges, and future directions. *Lancet* 2019; **394**(10206): 1376-86.
12. Fried LP, Tangen CM, Walston J, et al. Frailty in older adults: evidence for a phenotype. *The journals of gerontology Series A, Biological sciences and medical sciences* 2001; **56**(3): M146-56.
13. Cox SR, Ritchie SJ, Tucker-Drob EM, et al. Ageing and brain white matter structure in 3,513 UK Biobank participants. *Nat Commun* 2016; **7**: 13629.
14. Batty GD, Gale CR, Kivimaki M, Deary IJ, Bell S. Comparison of risk factor associations in UK Biobank against representative, general population based studies with conventional response rates: prospective cohort study and individual participant meta-analysis. *BMJ* 2020; **368**: m131.
